1 Insights into ancestry and adaptive evolution of the *Mycobacterium tuberculosis* complex  
2 from analysis of the emerging pathogen *Mycobacterium riyadhense*

3

4 Qingtian Guan<sup>1</sup>, Musa Garbati<sup>2,#a</sup>, Sara Mfarrej<sup>1</sup>, Talal AlMutairi<sup>2</sup>, Alicia Smyth<sup>3¶</sup>, Albel  
5 Singh<sup>4¶</sup>, Shamsudeen Fagbo<sup>5¶</sup>, John A. Browne<sup>3</sup>, Muhammad Amin urRahman<sup>2</sup>, Alya  
6 Alruwaili<sup>2</sup>, Anwar Hoosen<sup>2,#b</sup>, Conor J Meehan<sup>6</sup>, Chie Nakajima<sup>7,8</sup>, Yasuhiko Suzuki<sup>7,8</sup>,  
7 Apoorva Bhatt<sup>4</sup>, Stephen V. Gordon<sup>3,7</sup>, Faisal AlAsmari<sup>2</sup>, A. Pain<sup>1,7\*</sup>

8

9 <sup>1</sup>Pathogen Genomics Laboratory, BESE Division, King Abdullah University of Science  
10 and Technology (KAUST), Thuwal-Jeddah, Kingdom of Saudi Arabia

11 <sup>2</sup>King Fahad Medical City (KFMC), Riyadh, Saudi Arabia

12 <sup>3</sup>UCD School of Veterinary Medicine, University College Dublin, Dublin, D04 W6F6,  
13 Ireland

14 <sup>4</sup>Institute of Microbiology and Infection, School of Biosciences, University of  
15 Birmingham, Edgbaston, Birmingham, UK

16 <sup>5</sup>One Health Unit, Executive Directorate for Surveillance and Response, Saudi Center for  
17 Disease Prevention and Control, Riyadh, Saudi Arabia

18 <sup>6</sup>School of Chemistry and Biosciences, University of Bradford, Bradford, UK

19 <sup>7</sup>Global Institution for Collaborative Research and Education, Hokkaido University, Kita  
20 20 Nishi 10, Kita-ku, Sapporo, Japan

21 <sup>8</sup>Research Center for Zoonosis Control, Hokkaido University, Kita 20 Nishi 10, Kita-ku,  
22 Sapporo, Japan

23 #<sup>a</sup>Current address: Infectious Diseases Unit, Department of Medicine, University of

24 Maiduguri, Nigeria

25 <sup>¶</sup>These authors contributed equally to the work

26 #<sup>b</sup>Current address: Pathcare/Vermaak & Partners Pathologists, Pretoria, South Africa.

27 \*Correspondence author

28 Email: [arnab.pain@kaust.edu.sa](mailto:arnab.pain@kaust.edu.sa) (AP)

29

30

31

32

33

34

35

36

37

38

39

40

41

42

43

44

45

## 46 **Abstract**

47 Current evolutionary scenarios posit the emergence of *Mycobacterium tuberculosis*,  
48 the deadliest bacterial pathogen for humans globally, from an environmental saprophyte  
49 through a cumulative process of genome adaptation. *Mycobacterium riyadhense* is a novel  
50 non-tuberculous mycobacterium (NTM) that is being increasingly isolated from human  
51 clinical cases with tuberculosis (TB)-like symptoms in various parts of the world. We  
52 provide evidence here that *M. riyadhense* is likely a ‘missing link’ in our understanding of  
53 the evolution of *M. tuberculosis*. To elucidate the genomic hallmarks that define the  
54 evolutionary relationship between *M. riyadhense* and other mycobacterial species,  
55 including members of the *Mycobacterium tuberculosis* complex (MTBC), eight clinical  
56 isolates of *M. riyadhense* were sequenced and analyzed. We show, among other features,  
57 that *M. riyadhense* shares a large number of conserved orthologues with the MTBC;  
58 contains linear and circular plasmids carrying type IV and type VII secretion systems; and  
59 shows expansion of toxin/anti-toxin pairs. We conclude that *M. riyadhense* is an emerging  
60 mycobacterial pathogen that shares a common ancestor with members of the MTBC and  
61 that can serve as an experimental model to study the evolution and pathogenesis of tubercle  
62 bacilli.

63

## 64 **Author summary**

65 *Mycobacterium tuberculosis* is one of the most prolific infectious killers in humans  
66 and is a member of the *Mycobacterium tuberculosis* complex (MTBC) - a group of  
67 genetically related pathogens that cause tuberculosis (TB) in mammalian species. It is  
68 postulated that MTBC has evolved from a free-living environmental ancestor into an

69 obligate pathogen. In this evolutionary context, a comprehensive understanding of the  
70 genomic hallmarks of the free-living environmental ancestors of the MTBC is of particular  
71 scientific interest for better understanding of the evolution of the MTBC. *Mycobacterium*  
72 *riyadhense* is a novel environmental mycobacterium, first isolated in 2009 in a hospital in  
73 Riyadh, that is increasingly being isolated from clinical cases with typical tuberculosis  
74 (TB)-like symptoms in humans. In this study, we report the characterization of eight  
75 clinical isolates of *M. riyadhense*, compare their genomes to members of the MTBC, and  
76 provide a comprehensive insight into the adaptive changes associated with the evolution of  
77 the MTBC from environmental mycobacteria. We show that *M. riyadhense* is one of the  
78 closest known environmental mycobacteria related to the MTBC, and we provide several  
79 lines of molecular evidence that *M. riyadhense* is likely the ‘missing link’ in the evolution  
80 of *M. tuberculosis*. It shares a common ancestor with members of the MTBC that have  
81 evolved through a process of genome reduction, expansion of toxin/antitoxin (T/A) gene  
82 systems, and ultimately host adaptation.

83

## 84 **Introduction**

85 The *Mycobacterium tuberculosis* complex (MTBC) is a group of genetically related  
86 pathogens that cause tuberculosis (TB) in mammalian species. The hallmark member,  
87 *Mycobacterium tuberculosis*, is the single most deadly pathogen, causing over 1.6 million  
88 deaths globally in 2017. Current evolutionary scenarios posit the evolution of the MTBC  
89 from an environmental saprophyte through a cumulative process of genome adaptation.  
90 Such scenarios envisage intermediate mycobacterial species with increasing pathogenic  
91 potential for humans, the vestiges of which should be present in extant mycobacterial

92 species. Comparative genomic analyses between the MTBC members and opportunistic  
93 mycobacterial pathogens may therefore reveal the key evolutionary steps involved in the  
94 emergence of the MTBC, as well as illuminating virulence mechanisms across  
95 mycobacterial pathogens as a whole.

96 Non-tuberculous mycobacteria (NTMs), including *Mycobacterium riyadhense* (MR),  
97 are ubiquitous, naturally occurring environmental bacteria commonly found in water and  
98 soil[1,2]. A wide range of animal and environmental sources (aquaria, swimming pools)  
99 act as reservoirs for NTMs, and several human disease outbreaks caused by exposure to  
100 environmental NTMs have been described[3–6]. With the ability to cause infections in both  
101 immunocompromised[7] and immunocompetent[8] individuals, *M. riyadhense* has  
102 positioned itself as a clinically important pulmonary pathogen since its discovery in 2009  
103 [2]. The clinical and radiologic characteristics of pulmonary infection caused by  
104 *M. riyadhense* are indistinguishable from those caused by *M. tuberculosis*, the most  
105 important human pathogen of the MTBC [2,8].

106 Similar to *M. tuberculosis*, *M. riyadhense* grows at 37°C and requires 2~3 weeks[2]  
107 to form visible colonies on agar media. However, unlike *M. tuberculosis*, which is a  
108 worldwide pathogen transmitted directly from human-to-human with no known  
109 environmental reservoirs[9], *M. riyadhense* infections are rare and are transmitted to  
110 patients via contact with contaminated water[9] and soil[10], with no evidence of human-  
111 to-human transmission yet reported. Infections with *M. riyadhense* have been reported in  
112 Asia and Europe in countries including Bahrain, South Korea, France, Italy, and Germany  
113 [8,11,12], although most of the recent cases originated in patients from Saudi Arabia[13].

114 Indeed, the very first case of acute *M. riyadhense* infection was initially misdiagnosed as a  
115 case of *M. tuberculosis* infection in a Saudi hospital using commercially available  
116 diagnostic tests[14].

117 It is postulated that *M. tuberculosis* evolved from a free-living environmental ancestor  
118 into an obligate pathogen[15,16]. Our current knowledge indicates that *Mycobacterium*  
119 *canettii* is the most closely related obligate pathogenic species to the MTBC[17,18].  
120 Infections with *M. canettii* are rare and found solely in people from the Horn of Africa,  
121 with no environmental reservoir defined to date[19].

122 Previous phylogenetic studies have suggested that *Mycobacterium kansasii*[20],  
123 *Mycobacterium marinum*[21], *Mycobacterium lacus*[22], *Mycobacterium decipiens*[23],  
124 *Mycobacterium shinjukuense*[24] and *M. riyadhense*[25] are closely related to the free-  
125 living ancestor of the MTBC based on a single marker gene (e.g., *hsp65*, 16S). In the  
126 evolutionary context, a comprehensive understanding of the genomic hallmarks that drive  
127 the close phylogenomic relationship of *M. riyadhense* with the MTBC and NTMs is of  
128 particular scientific interest.

129 In this study, we report the characterization of eight clinical isolates of *M. riyadhense*,  
130 compare their genomes to members of the MTBC, and provide comprehensive insight into  
131 the adaptive changes associated with the evolution of the MTBC from environmental  
132 bacteria. We examined the lipid profiles of both rough and smooth variants of  
133 *M. riyadhense*, compared them to those of other related mycobacteria, and analyzed the  
134 transcriptional response of immunity-related host genes in a murine macrophage infection  
135 model with *M. riyadhense*, *M. kansasii*, and *M. bovis* BCG.

136 Using genome information, we developed a simple PCR-based diagnostic test for the  
137 rapid and accurate identification of *M. riyadhense* to minimize the risk of misdiagnosis in  
138 a clinical setting.

139 Our analyses provide a comprehensive description of the hallmarks of *M. riyadhense*  
140 that make it one of the closest known environmental relatives of the MTBC, and that can  
141 serve to illuminate studies into the evolution and pathogenesis of the MTBC.

142

## 143 **Results**

### 144 **Clinical manifestation and culture characteristics of *M. riyadhense* isolates**

145 Between April 2011 and March 2017, eight clinical cases of infection with  
146 *M. riyadhense* were recorded in male patients aged from 8-82 years (Fig 1). In addition to  
147 HIV/AIDS, most of the patients had multiple comorbidities, such as pulmonary and/or  
148 systemic hypertension, malignancies, and diabetes mellitus (DM), with the lung being the  
149 major site of disease (Fig 1).

150 Bronchoalveolar lavage, endotracheal, sputum, and lymph node biopsy specimens  
151 grew *M. riyadhense* colonies when cultured in solid and liquid media using LJ agar and  
152 *Mycobacteria* growth indicator tube (MGIT) broth, respectively, with varying times to  
153 positivity. Although no consistent findings existed for chest imaging, three out of the eight  
154 patients presented with upper lobe consolidation, cavitation, ground-glass opacities, ‘tree-  
155 in-bud’ appearance, hilar lymphadenopathy, and pleural effusion (S1 Fig).

156 The isolates were subjected to susceptibility testing for antibiotics commonly used to  
157 treat both typical and atypical infections. Isolates showed 100% susceptibility to rifampin  
158 (RIF), rifabutin (RFB), ethambutol (EMB), clarithromycin (CLR), linezolid (LZD),

159 amikacin (AMK), moxifloxacin (MOXI), and trimethoprim-sulfamethoxazole (TMP-  
160 SMX). Three out of the eight isolates were resistant to ciprofloxacin (CIP).

161

### 162 **Assembly and annotation of the *M. riyadhense* MR226 genome**

163 The comparison of different assemblies of all sequenced *M. riyadhense* strains is listed  
164 in Table S1. We obtained chromosomes of all eight isolates in single contiguous sequences  
165 for genome comparison at a high resolution. The *M. riyadhense* MR226 strain contains a  
166 6,243,587 bp chromosome, a linear plasmid (pMRLP01) of 550,247 bp and a circular  
167 plasmid (pMR01) of 94,344 bp. The circular nature of the chromosome and the pMR01  
168 plasmid were demonstrated through Gepard[26].

169 As expected of a free-living opportunistic pathogen, the chromosome of *M.*  
170 *riyadhense* is significantly larger than the chromosomes of the MTBC (Table 1). The  
171 number of genes unique in a species showed that the members of the MTBC have a  
172 considerably lower percentage of unique genes than *M. riyadhense* and other closely  
173 related NTMs (Table 1)



Table 1. Comparison of general features of genome in Mycobacteria

| Features         | <i>M. tuberculosis</i> | <i>M. africanum</i> | <i>M. bovis</i> | <i>M. canettii</i> | <i>M. riadhense</i>    | <i>M. kansasii</i>     | <i>M. marinum</i>  |
|------------------|------------------------|---------------------|-----------------|--------------------|------------------------|------------------------|--------------------|
| Genome Size (M)  | 4.41                   | 4.39                | 4.26            | 4.48               | Chromosome: 6.25       | Chromosome:            | Chromosome:        |
|                  |                        |                     |                 |                    | Plasmid pMRLP01: 0.55  | 6.43                   | 6.34               |
|                  |                        |                     |                 |                    | Plasmid pMR01: 0.09    | Plasmid pMK12478:      | Plasmid pRAW:      |
|                  |                        |                     |                 |                    |                        | 0.14                   | 0.11               |
| GC content (%)   | 65.6                   | 65.6                | 65.6            | 65.6               | Chromosome: 65.35      | Chromosome:            | Chromosome:        |
|                  |                        |                     |                 |                    | Plasmid pMRLP01: 67.36 | 66.2                   | 65.8               |
|                  |                        |                     |                 |                    | Plasmid pMR01: 65.69   | Plasmid pMK12478: 65.8 | Plasmid pRAW: 64.1 |
|                  |                        |                     |                 |                    |                        |                        |                    |
| CDS              | 3,906                  | 4,045               | 4,042           | 4,064              | Chromosome:            | Chromosome: 5,631      | Chromosome: 5,149  |
|                  |                        |                     |                 |                    | 5,490                  | Plasmid pMK12478:      | Plasmid pRAW:      |
|                  |                        |                     |                 |                    | Plasmid pMRLP01: 443   | 152                    | 94                 |
|                  |                        |                     |                 |                    | Plasmid pMR01: 88      |                        |                    |
| Gene Density(bp) | 1101                   | 1085                | 1032            | 1044               | Chromosome:            | Chromosome: 1142       | Chromosome: 1176   |
|                  |                        |                     |                 |                    | 1126                   | Plasmid pMK12478: 954  | Plasmid pRAW:      |
|                  |                        |                     |                 |                    | Plasmid pMRLP01: 1239  |                        | 1166               |
|                  |                        |                     |                 |                    | Plasmid pMR01: 1072    |                        |                    |

Continued Table 1. Comparison of general features of genome in Mycobacteria

| Conserved protein with assigned function | 2855 (73%) | 3078 (76%) | 3072 (76%) | 3125 (77%) | Chromosome: 4079 (74%)                                   | Chromosome: 4468 (79%)<br>Plasmid pMK12478:74 (49%)         | Chromosome: 4091 (79%)<br>Plasmid pRAW:                   |  |
|------------------------------------------|------------|------------|------------|------------|----------------------------------------------------------|-------------------------------------------------------------|-----------------------------------------------------------|--|
|                                          |            |            |            |            | Plasmid pMRLP01: 217 (49%)                               |                                                             | 38 (40%)                                                  |  |
|                                          |            |            |            |            | Plasmid pMR01: 22 (25%)                                  |                                                             |                                                           |  |
| Unique CDS                               | 62 (1.59%) | 25 (0.62%) | 40 (0.99%) | 83 (2.04%) | Chromosome:1059(19.29%)<br>Plasmid pMRLP01:293 (66.14%)  | Chromosome: 1,080 (19.18%)<br>Plasmid pMK12478: 61 (40.13%) | Chromosome: 993 (19.29%)<br>Plasmid pMK12478: 42 (44.68%) |  |
|                                          |            |            |            |            | Plasmid pMR01:32 (36.36%)                                |                                                             |                                                           |  |
| tRNA                                     | 45         | 45         | 47         | 45         | Chromosome: 51<br>Plasmid pMRLP01:1                      | Chromosome: 46<br>Plasmid: NA                               | Chromosome: 47<br>Plasmid: NA                             |  |
| rRNA                                     | 3          | 3          | 3          | 3          | Chromosome: 3<br>Plasmid: NA                             | Chromosome: 3<br>Plasmid: NA                                | Chromosome: 3<br>Plasmid: NA                              |  |
| Transposase/integrase                    | 53         | 68         | 56         | 98         | Chromosome:110<br>Plasmid pMR01:1<br>Plasmid pMRLP01: 72 | Chromosome:79<br>Plasmid pMK12478:3                         | Chromosome:41<br>Plasmid pRAW:4                           |  |
| Reference                                | [27]       | [28]       | [29]       | [17]       | This Study                                               | [30]                                                        | [31]                                                      |  |

176 The comparison of the annotated protein-coding genes from the *M. riyadhense*  
177 MR226 strain to the genome assemblies of 152 *Mycobacterium* species (including 77  
178 known mycobacterial plasmids) shows that *M. riyadhense* forms a tight cluster with  
179 *M. marinum* and *M. angelicum*, while the MTBC members clusters together with *M.*  
180 *shinjukuense*, *M. lacus* and *M. ulcerans* (S2(A) Fig, highlighted in box a). This clustering  
181 is not unexpected as *M. lacus*, *M. shinjukuense* and *M. ulcerans* have smaller genomes and  
182 have less predicted proteins as opposed to *M. riyadhense*, *M. marinum* and *M. angelicum*,  
183 whose genomes are greater than 6 Mb. A total of 335 genes were identified as unique from  
184 the orthologue group comparison, being present in only all sequenced *M. riyadhense*  
185 isolates, including MR226. The vast majority of these genes belong to the PE/PPE family,  
186 which are thought to be involved in antigen variation and are widely spread across the  
187 slow-growing species within the *Mycobacterium* genus.

188 Linear plasmids were first described in 1989 in maize (which has a linear  
189 mitochondrion)[32] and have also been found in *Actinomycetales*, including *Streptomyces*  
190 [33], *Rhodococcus*[34] and *Mycobacterium* species, such as *Mycobacterium xenopi*,  
191 *Mycobacterium branderi* and *Mycobacterium celatum*. They are often accompanied by a  
192 circular plasmid in the same host[35]. The linear plasmid pMRLP01 in *M. riyadhense*  
193 contains a pair of partitioning genes (*parA/parB*) that are involved in active segregation  
194 and thus stabilize the inheritance of the plasmid[36]. The latter are known to contribute to  
195 genome evolution by active DNA transfer and exchange[37]. As is often the case for both  
196 circular and linear large plasmids, a relatively higher proportion of pMRLP01 genes (51%)  
197 have no known function compared to those of the main chromosome (26%). This reinforces  
198 the notion that plasmids are an important route by which new genes are introduced into the

199 genome in *Mycobacteria*. Of the 443 predicted protein-coding genes of pMRLP01, 118  
200 have at least one orthologue on the main chromosome. Furthermore, we observed several  
201 protein-coding genes in pMRLP01 that have orthologues in the genomes of *Mycobacterium*  
202 *tusciae* JS617, *Mycobacterium aromaticivorans* JCM 16368, *Mycobacterium llatzerense*,  
203 *Mycobacterium obuense*, *Mycobacterium novocastrense* and *Mycobacterium holsaticum*  
204 (S2(B) Fig). This finding indicates that pMRLP01 can be readily exchanged with other  
205 environmental mycobacterial species, with implications for horizontal gene transfer in  
206 mycobacteria.

207 It is well known that plasmids are important “vehicles” for the exchange of genetic  
208 material between bacteria or between chromosomes and extra-chromosomal plasmids. In  
209 this study, we further identified a circular plasmid termed pMR01 in *M. riyadhense* (Figs  
210 S2(C) and S3). When compared with the circular plasmids of other species, such as pRAW  
211 in *M. marinum*[38], pMAH135[39] and pMA100[40] of *M. avium*, pMyong1 from  
212 *Mycobacterium yongonense*[41], pMK12478[42] from *M. kansasii* and several plasmids  
213 from *Mycobacterium chimaera*[43], a high similarity was observed. These plasmids all  
214 harbor both a T4S and T7S, which are necessary for conjugation[38,44], and facilitate the  
215 exchange of genetic material between different species of slow-growing mycobacteria[38].  
216 We therefore speculate that pMR01 is a novel conjugative plasmid.

217 In mycobacteria, five type VII secretion systems have been described, named ESX-1  
218 to ESX-5[45,46]. An ESX-P5 locus on pMR01, which shows high similarity to the ESX-5  
219 loci on pMK12478, pRAW and pMAH135, is markedly different from the ESX-5 system  
220 found on the main *M. riyadhense* chromosome. ESX-5 is involved in the secretion of PE  
221 and PPE proteins in *M. tuberculosis* and is involved in modulating the host immune

222 responses to maintain a persistent infection[47]. The potential transmissibility of pMR01  
223 and other pMR01-like plasmids may therefore play a role in the evolution of the ESX  
224 systems in mycobacteria.

225 The progressive alignments (S4(A) Fig) of the assembled chromosomes and plasmids  
226 (S4(B) Fig) of each *M. riyadhense* strain show that the chromosomes are relatively  
227 conserved; however, the linear plasmids present in all eight sequenced isolates are diverse  
228 from both structural and similarity perspectives, while the pRAW-like plasmids are present  
229 in only the MR226, MR193 and MR222 strains.

230 The SNP-based phylogeny of the sequenced *M. riyadhense* isolates based on 43,136  
231 polymorphic sites (S2 Table, S5 Fig) indicates the presence of two different clades of  
232 *M. riyadhense* among the clinical isolates sequenced in this study. The nucleotide diversity  
233 between the MR222 clade is greater than the diversity between *M. tuberculosis* strains[48],  
234 while it is smaller than that seen between *M. canettii* strains[17], and the variation between  
235 the MR226 clade is comparable to the SNP variation in *M. tuberculosis* strains.

236

### 237 **Regions of difference (RDs) in *M. riyadhense***

238 The RDs were originally described as genomic regions present in virulent *M. bovis*  
239 and *M. tuberculosis* but absent from the *M. bovis* BCG genome[49]. RD loci were  
240 subsequently described across the MTBC[50] and contain functions believed to contribute  
241 to pathogenicity[51–53] and evolution of MTBC species[54]. *M. riyadhense* was found to  
242 harbor most of the RD loci (RD1, RD3-R11, R13-RD16) that are also intact in  
243 *M. tuberculosis*, while 2 of the RDs show unique deletions, RD2<sup>riyadh</sup> (S6(A) Fig) and  
244 RD12<sup>riyadh</sup> (S6(B) Fig).

245 RD2 was originally described as deleted in BCG vaccine strains. Subsequently, it was  
246 shown that disruption of RD2 in *M. tuberculosis* leads to decreased proliferation *in vivo*  
247 and impaired modulation of the innate immune response[52]. The RD2 locus also has a  
248 deletion from the *M. riyadhense* genome. It is a larger deletion than the originally described  
249 RD2<sup>BCG</sup> as RD2<sup>riyadh</sup> contains 29 genes (*rv1971~rv2000*, location 2,216,498~2,246,766);  
250 eight genes within this locus (*rv1978, rv1979c, rv1980c, rv1981c, rv1983, rv1984, rv1987,*  
251 *rv1988*) have orthologues elsewhere in the *M. riyadhense* genome (*mr\_05764, mr\_05852,*  
252 *mr\_02310, mr\_02993, mr\_00486, mr\_02995, mr\_02325, mr\_02349, mr\_01747*),  
253 suggesting possible functional redundancy.

254 The RD12 locus shows deletions across MTBC members, including *M. bovis*,  
255 *Mycobacterium caprae* and *M. orygis*[55], but it is present in other MTBC members.  
256 *M. canettii* isolates (except group B[56]) also show an independent deletion at the RD12  
257 locus named RD12<sup>can</sup> (3,479,430~3,491,866, *rv3111~rv3126*), which is distinct from  
258 RD12<sup>bovis</sup> (3,484,740~3,487,515, *rv3117~rv3121*). We identified another unique deletion  
259 at the RD12 locus in *M. riyadhense*, designated RD12<sup>riyadh</sup>, which encompasses a larger  
260 region than RD<sup>can</sup> and RD12<sup>bovis</sup>, encompassing *rv3108~rv3127* (3,477,171~3,492,150)  
261 (S6(B) Fig). It is intriguing that multiple mycobacteria show independent deletion events  
262 at the RD2 and RD12 loci, suggesting selective forces play a role in this variation.

263

## 264 **Comparative phylogeny of *M. riyadhense* with other Mycobacteria**

265 The phylogenetic tree shows that the slow-growers and rapid-growers are separated  
266 into two different clades and that fast-growers are ancestral compared to slow-growers (Fig  
267 2). The overall topology of our tree is similar to that of previously published phylogenetic

268 trees[22]. In the tree, *M. riyadhense* is located within the same clade as the obligate and  
269 opportunistic causal organisms of mycobacterial diseases in humans that include the  
270 MTBC, *M. marinum*, *M. kansasii*, *M. leprae* and related host-restricted mycobacteria with  
271 reduced genomes and decreased survivability in the environment.

272 The PE/PPE family *mce* and *mce*-associated genes are known to be important for host  
273 adaptation[57] and pathogenicity[58]. The PE/PPE family genes are enriched in the MTBC  
274 members but also in *M. riyadhense* MR226 (278) and other pathogenic species, such as  
275 *M. kansasii* (228) and *Mycobacterium ulcerans* (200). The number of *mce*- or *mce*-  
276 associated genes has not significantly changed across mycobacterial genomes, indicating  
277 that this group of genes is under an evolutionary constraint and plays functional roles  
278 bridging both environmental and obligate pathogen lifestyles. Our results agree with  
279 previous findings that during their evolution, the ESX systems were derived from the  
280 ancestor ESX-4, as shown in Fig 2 at the root node, and then ESX-3, ESX-1, ESX-5 and  
281 ESX-2 evolved by horizontal transfer[59].

282 A comparative phylogenetic map based on 906 conserved proteins (S7 Fig) reveals  
283 this downsizing of the genome and the dynamic changes in genome components. Certain  
284 functional categories of genes are relatively enriched during the evolution of MTBC,  
285 including protein metabolism, regulation and cell signalling, cell division and cell cycle.

286 *M. riyadhense* shares a larger number of orthologues (3,122) with *M. tuberculosis*  
287 than with *M. kansasii* (2,978), *M. marinum* (2,962) and *M. szulgai* (2,724) among the  
288 environmental mycobacteria that are closely related to the MTBC (Fig 3(A)). A total of  
289 134 orthologues are exclusively shared between *M. riyadhense* and *M. tuberculosis*, while  
290 the number of orthologues exclusively shared between *M. tuberculosis* and *M. kansasii*

291 (30), *M. marinum* (48) and *M. szulgai* (18) is less (Fig 3(A)). It is notable that genes from  
292 the phage-derived regions of RD3 and RD11 are shared exclusively between *M. riyadhense*  
293 and *M. tuberculosis*.

294 The comparative analysis of the orthologue groups of *M. riyadhense* and the MTBC  
295 is informative. Firstly, 385 orthologue groups present across all MTBC species are absent  
296 from *M. riyadhense*. Secondly, 221 orthologues uniquely present in *M. riyadhense* are not  
297 found amongst the MTBC (Fig 3(B)). This latter group of *M. riyadhense* unique  
298 orthologues likely depict the constraints imposed by the free-living biology of *M.*  
299 *riyadhense* which necessitates maintaining a broad functional repertoire to secure  
300 environmental survival. In contrast, the obligate MTBC species have lost genes involved  
301 in environmental survival but gained a large number of genes required for survival in the  
302 *in vivo* environment.

303 A hallmark of *M. tuberculosis* infection is the ability to survive long-term in host  
304 granulomas and develop a latent stage of infection. The molecular mechanisms and cellular  
305 components that are involved in the persistence of *M. tuberculosis* are still poorly  
306 understood, but several T/A systems have been implicated in the pathogenicity of  
307 *M. tuberculosis*[60]. T/A systems were first found on plasmids or plasmid-derived  
308 chromosomal loci where they promoted plasmid maintenance in bacterial populations[61],  
309 but when compared to other mycobacteria, the MTBC are remarkable for the extensive  
310 expansion of T/A systems. We thus compared the 79 pairs of T/A systems (belonging to  
311 the HigAB, MazEF, ParDE, RelEF, VapBC and UCAT families) in *M. tuberculosis* with  
312 the T/A pairs found in other members of the MTBC and NTMs. Based on the presence of  
313 49 out of the 79 T/A orthologue pairs (Fig 4), *M. riyadhense* appears more closely related



314 to the MTBC than to other mycobacteria, including *M. lacus*, *M. shinjukuense* and  
315 *M. decipiens*. It can be hypothesized that the shared component of T/A pairs play a  
316 functional role in the pathogenicity or persistence of *M. riyadhense* infection in a way  
317 similar to that described for the importance of T/A pairs in *M. tuberculosis in vivo* biology.

318

### 319 ***M. riyadhense* strains produce a distinct pattern of LOSs**

320 The lipopolysaccharides (LOSs) are an important class of glycolipids that have  
321 previously been linked to diverse mycobacterial phenotypes, such as colony morphology,  
322 secretion of PE/PPE family proteins, and the pathogenicity of *M. marinum*[62]. It is  
323 noteworthy that we observed both smooth (MR210, MR22, MR226, MR244, MR246, and  
324 MR1023) (Fig 5(A)) and rough (MR193 and MR206) (Fig 5(B)) morphologies in *M.*  
325 *riyadhense* strains. We therefore sought to first examine whether the genetic machinery for  
326 the production of LOS is present in the *M. riyadhense* genome, and then to follow up on  
327 the genome-level predictions with lipid analyses of rough and smooth variants using Thin-  
328 layer Chromotagraphy (TLC).

329 We observed that the *wecE* and *gale6* LOS genes are absent from the *M. riyadhense*  
330 genome (Table 2, S3 Table). These genes are linked with the removal of LOS II\* and the  
331 production of LOS IV[62]. Thus, their absence is likely to cause an accumulation of LOS  
332 II\* and the lack of fully formed LOS IV, which have previously been shown to increase  
333 the pathogenicity of *M. marinum*[62]. Furthermore, both the *pks5* and *pap* genes in the  
334 LOS locus are intact in *M. riyadhense*, as is the case in *M. canettii*, but not in  
335 *M. tuberculosis*, where the former is truncated and the latter deleted[63]. This finding  
336 indicates that *pks5* recombination and *pap* deletion occurred in a common ancestor of the

337 MTBC after its differentiation from both *M. riyadhense* and *M. canettii*. Remarkably, the  
338 *M. riyadhense* LOS gene locus layout is dissimilar to that in *M. canettii*, *M. tuberculosis*,  
339 *M. kansasii* and *M. marinum*: indeed, exclusive rearrangements of this locus in *M.*  
340 *riyadhense* were observed (Fig 5(C)).

Table 2. Presence and absence of the *M. marinum* orthologs related to LOS synthesis in *M. riyadhense* and other species

|                            | <i>M. smegmatis</i> | <i>M. kansasii</i> | <i>M. canettii</i> | <i>M. riyadhense</i> | <i>M. tuberculosis</i> |
|----------------------------|---------------------|--------------------|--------------------|----------------------|------------------------|
| MMAR_1008                  | P                   | P                  | P                  | P                    | P                      |
| MMAR_2307                  | A                   | P                  | A                  | P                    | A                      |
| MMAR_2313                  | A                   | P                  | P                  | P                    | P                      |
| MMAR_2319                  | A                   | A                  | A                  | A                    | A                      |
| MMAR_2320 ( <i>wecE</i> )  | A                   | P                  | P                  | A                    | A                      |
| MMAR_2327                  | A                   | P                  | P                  | P                    | P                      |
| MMAR_2332                  | A                   | A                  | A                  | A                    | A                      |
| MMAR_2336 ( <i>galE</i> )  | A                   | P                  | A                  | A                    | A                      |
| MMAR_2340 ( <i>pks</i> )   | P                   | P                  | P                  | P                    | T                      |
| MMAR_2341                  | P                   | P                  | P                  | P                    | P                      |
| MMAR_2343 ( <i>pap</i> )   | P                   | P                  | P                  | P                    | A                      |
| MMAR_2353                  | P                   | P                  | A                  | P                    | A                      |
| MMAR_5170 ( <i>whiB4</i> ) | P                   | P                  | P                  | P                    | P                      |

P: Present; A: Absent; T: Truncated

341

342

343 To correlate rough vs. smooth colony morphology with LOS production, we extracted  
344 polar lipids from the strains and analyzed them by 2D-TLC using solvent system E[64],  
345 which is designed to separate phospholipids and LOSs. Charring of the TLC plates with  
346 alpha-naphthol revealed glycolipids, including the accumulation of a species that migrated  
347 at a position similar to that of LOS III. This lipid was seen in only smooth strains; species  
348 with migration patterns similar to LOS I and LOS II were observed, while LOS IV was  
349 absent. This result was not unexpected because all *M. riyadhense* strains lack a functional  
350 *wecA* gene, which is required for the extension of LOS II to LOS IV (Fig 5). Additionally,  
351 the relative levels of the predominant LOS species in *M. riyadhense* seem to be quite high  
352 when compared to those seen in other LOS-producing mycobacteria (Figs 5(D)(E)).  
353 Conversely, the rough strains did not produce any glycolipids that migrated in the positions  
354 corresponding to LOSs (Figs 5(F)(H)).

355

### 356 ***PE-PGRS33* locus and type VII secretion system of *M. riyadhense***

357 The *pe-pgrs33* (*rv1818c*) locus encodes the exported protein PE\_PGRS33 and plays  
358 an important role in the pathogenesis of *M. tuberculosis*[65]. A previous study[66] showed  
359 that *pe-pgrs33* is present in all MTBC members but not in *M. canettii*, which implies a  
360 specific *pe-pgrs33* insertion event in the ancestor of MTBC strains. Genome comparison  
361 of *M. riyadhense* with *M. tuberculosis*, *M. kansasii*, *M. marinum* and *M. canettii* provides  
362 additional evidence that *M. riyadhense* is the missing link of the *pe-pgrs33*  
363 deletion/insertion event. Our phylogeny strongly suggests that the deletion of *pe-pgrs33*  
364 from *M. kansasii* and *M. marinum* occurred before the divergence of environmental  
365 mycobacteria and the smooth tubercle bacilli (STB)/MTBC clade (S8 Fig).

366 All 5 ESX systems (ESX1-ESX5) were found in the *M. riyadhense* genome (S9 Fig)  
367 but with minor modifications. Hence, the *eccA* and *eccB* genes are absent from the ESX-2  
368 system, while the *espACD* operon, which is essential for secretion of virulence factors via  
369 ESX1, is also missing in *M. riyadhense*. The overall gene arrangement of the ESX1-ESX5  
370 loci is similar in both *M. riyadhense* and *M. tuberculosis*[45]. This conserved synteny  
371 reinforces the previous results that phylogenetically *M. riyadhense* may represent an  
372 ancestral state to MTBC. As noted before, the pMR01 plasmid also contains an extra ESX-  
373 P5 locus, which could indicate a role for this plasmid in mediating pathogenicity (S3 Fig).

374

### 375 **Transcriptional response of murine macrophage cells upon *M. riyadhense*** 376 **infection**

377 Our genomic analysis of *M. riyadhense* revealed a range of genes and potential  
378 systems that could play a role in host-pathogen interactions. We therefore sought to assess  
379 the initial interaction of *M. riyadhense* with macrophages, using the RAW264.7 cell line  
380 of murine origin as our experimental model. As comparator strains in our analysis, we  
381 performed parallel infections with *M. kansasii*, an opportunistic pathogen that also contains  
382 an orthologous ESX-1 system (Fig 2), and *M. bovis* BCG, the live TB vaccine that is  
383 attenuated through deletion of the ESX-1 system. These comparisons allowed us to explore  
384 whether *M. riyadhense*-triggered innate immune responses were more similar to those  
385 triggered by *M. kansasii* or BCG or were intermediate between the two.

386 To analyze the innate immune responses of the macrophages in the intracellular  
387 presence or absence of these mycobacterial isolates, the transcriptional response was  
388 analyzed using a 754 probe NanoString Murine Myeloid Innate Immunity panel V2[67]

389 at 3, 24 and 48 hours post infection. These analyses revealed an expected commonality in  
390 the responses to infection with all mycobacteria, such as induction of proinflammatory  
391 genes through TLR signalling (e.g., upregulation of *IL1B*, *TNFA*, *CCL4*, *PTGS2* and  
392 *CXCL2*, albeit to different absolute levels, (Figs 6, S10(A) and S10(B)). Distinct responses  
393 triggered by BCG infection compared to *M. riyadhense* and *M. kansasii* included, for  
394 example, upregulation of *MARCO* by BCG infection (S10(B) Fig); *MARCO* is involved in  
395 pathogen uptake via trehalose dimycolate, a lipid that is known to show variation in  
396 structure between the MTBC and *M. kansasii*[68,69]. *CCL24* and *CXCL14*, which are  
397 involved in the attraction of immune cells to the site of infection[70], were upregulated to  
398 higher levels with *M. riyadhense* and *M. kansasii* than with BCG at 24 and 48 hours.

399 Overall, our analysis of the macrophage transcriptional profiles showed that the  
400 response to infection with *M. riyadhense* and *M. kansasii* triggered more similar  
401 macrophage transcriptional responses in comparison to the response produced by BCG  
402 infection (S10 Fig).

403

#### 404 **Developing a rapid PCR-based diagnostic marker for *M. riyadhense***

405 Due to the issues previously encountered in diagnosing *M. riyadhense* infections[2,8],  
406 correct and prompt identification of cases upon presentation at healthcare units is of  
407 paramount importance. We therefore sought to translate our knowledge on the genome  
408 sequences into a PCR diagnostic test that could be used in a clinical microbiology setting  
409 to distinguish *M. riyadhense* from other mycobacteria, including the members of the  
410 MTBC.

411 By identifying unique K-mers ranging in size from 11 bp to 4,209 bp (S11 Fig) in the  
412 assembled genome compared to the genomes of 152 other mycobacterial species, four  
413 primer sets were developed targeting the *mr\_00036*, *mr\_00263*, *mr\_00606* and *mr\_01005*  
414 genes. The MRDP primer pair MRDP-F/MRDP-R amplified a single product from each of  
415 the eight isolates of *M. riyadhense* (Fig 7) but not from other mycobacterial species,  
416 including *M. tuberculosis*, *M. bovis*, *M. kansasii*, *M. marinum*, *M. szulgai*, *M. avium* and  
417 *Mycobacterium angelicum*. This result shows that the MRDP-F/MRDP-R primers are  
418 highly specific to *M. riyadhense* and form the basis for a simple diagnostic PCR that can  
419 inform appropriate treatment protocols.

420

## 421 **Discussion**

422 *M. riyadhense* has become a clinically relevant NTM species globally[8,71]. Contrary  
423 to prior publications on *M. riyadhense* that have been based primarily on clinical case  
424 reports, here we present the largest and most comprehensive genomic study undertaken to  
425 date on clinical *M. riyadhense* isolates. The eight new *M. riyadhense* strains sequenced in  
426 this study originated from pulmonary infections with some having additional extra-  
427 pulmonary involvement, which fulfilled the American Thoracic Society/ Infectious  
428 Diseases Society of America (ATS/IDSA) criteria for NTM infection[72].

429 Our comparative analysis of *M. riyadhense* genomes with the MTBC and a large  
430 collection of NTMs provide unequivocal evidence that *M. riyadhense* is one of the closest  
431 known environmental mycobacteria species to the MTBC and forms a phylotype with  
432 *M. lacus*, *M. decipiens* and *M. shinjukuense*. Indeed, while our manuscript was in  
433 preparation, independent work [73] also showed the close phylogenetic relationship of

434 *M. riyadhense* to the MTBC, suggesting that it forms part of an MTB-associated phylotype.  
435 Our analyses of multiple *M. riyadhense* isolates complements and extends the findings of  
436 Sapriel and Brosch by revealing that expansion of T/A pairs, modification of secretion  
437 systems, alterations in cell wall lipids, and plasmid-mediated horizontal acquisition of new  
438 functionality all played key roles in the evolution of the MTBC. Our work hence adds new  
439 insight into the evolution of the MTBC from free-living environmental bacteria to obligate  
440 pathogens.

441 Our study shows that *M. riyadhense* shares a larger number of orthologues with  
442 *M. tuberculosis* than *M. kansasii* and *M. marinum*, notably in the T/A gene family (Figs 3  
443 and 4). Forty-nine pairs of T/A gene orthologues were found in *M. riyadhense*, far greater  
444 than the number of orthologues observed in any of the other NTMs. The expansion of T/A  
445 genes among the MTBC offers additional evidence that suggested original acquisition of  
446 T/A modules into mycobacteria through lateral gene transfer played a key role in the  
447 development of pathogenicity[21,74].

448 *M. riyadhense* strains appeared as both smooth and rough colony forms when grown  
449 on solid LJ media. The observation of smooth and rough colony variants is seen in other  
450 mycobacterial pathogens where it is linked to presence or absence of LOS; for example,  
451 the presence or absence of LOS from *M. canettii* causes a transition from smooth to rough  
452 colony variants, respectively, with rough variants showing increased virulence; MTBC  
453 strains lack LOS, and it has been suggested that the removal of LOS was a key event in the  
454 evolution of the MTBC species towards their current obligate pathogen status [63]. In  
455 *M. riyadhense* smooth colony variants we observed the presence of LOS I and LOS II but  
456 the absence of LOS IV. These biochemical observations agree with the genomic prediction



457 that *M. riyadhense* strains lack a functional *wecA* gene, which is required for the extension  
458 of LOS II to LOS IV. Overall, our results show that *M. riyadhense* exhibits a LOS  
459 production phenotype distinct from that of other LOS-producing mycobacteria.

460 The ESX Type VII secretion systems are key elements of mycobacterial virulence.  
461 All the 5 ESX type VII secretion systems present in *M. tuberculosis*, and known to be  
462 involved in virulence and pathogenicity, were found in *M. riyadhense* with very similar  
463 gene arrangement. An additional ESX-P5 system was also found on the circular plasmid  
464 pMR01. pMR01-like plasmids have been shown in many different NTMs, including  
465 *M. kansasii*, *M. marinum*, *M. chimaera* and *M. avium*, indicating that these groups of  
466 plasmids containing both T4S and T7S are conjugative plasmids. The extensive presence  
467 of these plasmids may also explain the origin of the type VII secretion system [38]. ESAT-  
468 6 and CFP-10, which are secreted through ESX-1, are critical to phagosome perturbation  
469 and manipulation of host macrophages induced by *M. tuberculosis*[75]. Linked to this, our  
470 transcriptome analysis revealed that *M. riyadhense* and *M. kansasii* trigger similar overall  
471 macrophage responses after infection when compared to *M. bovis* BCG (as a representative  
472 of the MTBC). These data reinforce the phylogenetic relationship of *M. riyadhense* with  
473 the MTBC species and its transitional status between an opportunistic and an obligate  
474 pathogen.

475 The clinical presentation of our cases was by and large indistinguishable from disease  
476 caused by *M. tuberculosis*, as reported earlier[7,8], but with a negative *M. tuberculosis*  
477 PCR. Due to the relatively recent emergence of *M. riyadhense* as an important clinical  
478 pathogen coupled with its misdiagnosis as *M. tuberculosis* by commercially available kits,  
479 we developed an accurate set of diagnostic markers based on the genomic datasets

480 generated in this study. The primer sets accurately detect *M. riyadhense* in a mixed cocktail  
481 of closely related mycobacteria, and can hence serve as part of an accurate and fast  
482 diagnostic protocol in clinical settings thus reducing the need for strict isolation, laborious  
483 contact tracing, and inappropriate use of TB antimicrobials. Going forward, these primers  
484 could be used in a global epidemiological survey of cases of *M. riyadhense* infections in  
485 humans, animals and the environment, providing a more complete picture of the  
486 epidemiology of *M. riyadhense* following a broad One Health approach. It would, for  
487 example, be of clinical interest to see if *M. riyadhense* infections occur in Africa and South  
488 America, for which no reports are available, or if *M. riyadhense* is uniquely endemic in the  
489 Arabian Peninsula. Indeed, a limitation of this and previous similar studies is that all  
490 isolates available for genomic studies are clinical. *M. riyadhense* is an environmental  
491 pathogen, and hence it may be found in animals sharing the same niche with humans that  
492 were infected from the environment. As the environmental reservoir of *M. riyadhense*  
493 remains unknown, we believe that systematic screening of relevant environmental samples  
494 with the MRDP established in this study may help to establish the natural habitat of this  
495 bacterium and hence allow improved infection control.

496 In conclusion, our study provides unprecedented insights into the ancestry and  
497 adaptive evolution of the MTBC relative to extant NTM species and places *M. riyadhense*  
498 as one of the closest relatives to the MTBC. Our work provides compelling data to support  
499 the use of *M. riyadhense* as a novel mycobacterium for the study of virulence, evolution  
500 and pathogenesis in the MTBC.

501

## 502 **Materials and Methods**

503 **Ethics Statement**

504 The research protocol was approved by the Institutional Review Board of King Fahad  
505 Medical City (Riyadh, Saudi Arabia; #16-345) and the Institutional Biosafety and  
506 Bioethics Committee of King Abdullah University of Science and Technology (Jeddah,  
507 Saudi Arabia; #18IBEC23). All adult subjects provided informed and written consent. A  
508 parent or guardian of any child participant provided informed consent on their behalf.

509

510 **Clinical reports and bacterial strains**

511 Eight *M. riyadhense* strains were collected in Riyadh, Saudi Arabia, between June  
512 2011 and March 2016 (Fig 1) from patients with a positive culture for *M. riyadhense*  
513 isolated from the microbiology laboratory at the King Fahad Medical City (KFMC) in  
514 Riyadh, Saudi Arabia. The patient and sample data collected included demographic and  
515 clinical characteristics, age, sex, clinical features at presentation, presence of comorbidities,  
516 including HIV co-infection, antimicrobial susceptibility, initial and modified therapy,  
517 where applicable; and treatment outcome. Once an isolate was suspected to be an NTM,  
518 the samples were sent to the reference laboratory for full identification and antimicrobial  
519 susceptibility testing. Radiographic and pathologic data were also collected.

520

521 **Culturing, DNA isolation and sequencing of bacteria**

522 The *M. riyadhense* strains were grown on Lowenstein Jensen (LJ) slants at 37 °C for  
523 two weeks, DNA was extracted using a phenol-chloroform protocol [76], and the quality  
524 was measured by Qubit. Twenty micrograms of high-molecular-weight (HMW) DNA from  
525 the eight *M. riyadhense* strains was sequenced using a PacBio RSII sequencer (Pacific

526 Biosciences, Menlo Park, USA) with a 10 kb library. A NEBNext Ultra II DNA library  
527 preparation kit (New England BioLabs, Massachusetts USA) was used to prepare libraries  
528 according to the manufacturer's instructions, and sequences from each library were  
529 generated for all *M. riyadhense* strains using the Illumina HiSeq 4000 platform (Illumina,  
530 San Diego, United States).

531

### 532 **Genome assembly and annotation**

533 The Illumina short reads were trimmed, and low-quality reads were removed by  
534 Trimmomatic [77]. Eight consensus genomes based on each strain were assembled into  
535 contigs with the PacBio long reads using the Canu assembler [78]. After assembly, the draft  
536 genome was then corrected with short Illumina reads using Pilon [79] software. The  
537 circularity of assemblies was checked by Gepard [26], and assemblies were annotated by  
538 Prokka [80]. A circular map of the chromosome was compared with that of *M. tuberculosis*  
539 H37Rv and visualized with BRIG [81]. The genome of the *M. riyadhense* MR226 strain  
540 was used as a high-quality reference in this study.

541

### 542 **Comparison of chromosomal and plasmid gene contents of *M. riyadhense* to those of** 543 **various *Mycobacterium* species**

544 DNA sequences of 152 mycobacterial species and 77 mycobacterial plasmids were  
545 obtained from the NCBI genome database and independently annotated by Prokka [80].  
546 The predicted protein sequences from the chromosome and each of the two plasmids  
547 (pMRLP01 and pMR01) of the *M. riyadhense* MR226 strain were then compared with the  
548 annotated genes from the rest of the mycobacterial species using Proteinortho[82]. The

549 obtained orthologues were visualized with the heatmap package in R [83]. A focused  
550 OrthoMCL[84] comparison was performed between (1) *M. riyadhense*, *M. marinum*, *M.*  
551 *kansasii*, *M. szulgai* and *M. tuberculosis* and (2) *M. riyadhense* and five species from the  
552 MTBC, namely, *M. tuberculosis*, *M. bovis*, *M. canettii*, *M. mungi*, and *M. africanum*.

553

#### 554 **SNP calling and phylogeny based on SNPs**

555 The corrected Illumina reads were mapped using BWA[85] on to the *M. riyadhense*  
556 MR226 genome assembly. Picard tool[86] was used to clean SAM files, fix mate-pair  
557 information and mark duplicates. SNPs were called for two iterations and filtered (QD<2.0,  
558 FS>60.0, SOQ>4.0, ReadPosRankSum<-8.0) with Genome Analysis Toolkit (GATK)[87].  
559 An alignment file was generated by SVAMP[88], and phylogeny was generated by  
560 RaxML[89] with the TVM model.

561

#### 562 **Phylogeny of *M. riyadhense***

563 The PhyPhlAn2[90] pipeline was used to identify protein sequences from 400  
564 conserved genes in the pangenome datasets and the *Mycobacterium* genomes available at  
565 NCBI or JGI. A total of 149 species were used and *Nocardia abscessus* was used as the  
566 out-group.

567 A whole-genome phylogenetic tree was constructed with the MTBC species (*M.*  
568 *tuberculosis*, *M. bovis*, *M. canettii*, *M. mungi*, *Mycobacterium orygis*, *M. africanum*) and  
569 with *M. kansasii*, *M. marinum*, *M. shinjukuense*, *Mycobacterium leprae*,  
570 *Mycobacterium smegmatis*, *Mycobacterium parmensis*, *Mycobacterium avium* and  
571 *Mycobacterium abscessus*. The one-to-one orthologues of each species were obtained

572 using OrthoMCL and concatenated, then aligned with Muscle[91] and trimmed with  
573 TrimAL[92]. The concatenated sequences were composed of 906 genes encoding 296,124  
574 amino acids and were used to build a phylogenetic tree with the LG+G+F model, which  
575 was selected by the ModelGenerator. The phylogenetic tree was generated by RaxML[89].

576

577 **Toxin/antitoxin systems, *mce/mce*-associated genes and ESX systems in *M. riyadhense***  
578 **and other mycobacteria**

579 One hundred fifty-eight T/A proteins belonging to the VapBC, RelEF, HigBA,  
580 MazEF, ParDE and UCAT families were downloaded from the NCBI protein database. We  
581 identified the *M. tuberculosis* T/A orthologues from all of the 149 species by  
582 Proteinortho[82], and the orthologue groups were also examined by Blast+ 2.4.0. The same  
583 pipeline was also applied for the MCE/MCE-associate genes, PhoPR, DosRS, PE/PPE, PE-  
584 PGRS, and ESX1-5.

585

586 **Infection of the RAW 246.7 cell line with *M. riyadhense*, *M. kansasii* and *M. bovis* BCG**  
587 **Denmark**

588 The murine macrophage RAW264.7 cell line obtained from the American Type  
589 Culture Collection (ATCC, Manassas, USA) was cultured in Dulbecco's modified Eagle's  
590 medium (DMEM) (ThermoFisher Scientific, Waltham, USA) supplemented with 10% FCS,  
591 streptomycin, and penicillin. *M. riyadhense*, *M. kansasii* (subtype I), and *M. bovis* BCG  
592 Denmark strains were grown in Middlebrook 7H9 liquid medium after single-colony  
593 isolation from LJ slants or 7H10 agar. 7H9 was supplemented with 10% albumin, dextrose  
594 and catalase (ADC), while 7H10 was supplemented with oleic acid, albumin, dextrose and

595 catalase (OADC) in addition to 0.2% glycerol. Ready to use LJ slants were provided by  
596 Saudi Prepared Media Laboratory (SPML, Riyadh, Saudi Arabia).

597 Before the infection, all bacterial cultures were centrifuged at 1,000xg for 10 minutes.  
598 The supernatant was discarded, and 10-15 3 mm glass beads were added to the pellet and  
599 then vortexed for 1 minute to break up clumps. Six ml of DMEM was added to the pellet  
600 and left to rest for 5 minutes. The upper 5 ml of the suspension was removed to a fresh 15  
601 ml falcon tube, which was then centrifuged for an additional 3 minutes at 200xg to remove  
602 remaining bacterial clumps. The supernatant was then taken and passaged using a 26G  
603 hypodermal syringe approximately 15 times to further break up any clumps of bacteria.  
604 The optical density of the culture was measured again before the infection experiment.

605 RAW264.7 cells were seeded at  $2 \times 10^5$  cells per well in 24-well flat-bottom tissue  
606 culture plates 24 hours prior, reaching  $5 \times 10^5$  cells per well. The DMEM over the cells was  
607 removed, and the cells were washed once with phosphate-buffered saline (PBS). The cells  
608 were infected by applying 1 ml of DMEM containing the prepared mycobacteria from the  
609 former steps at an appropriate concentration to reach a MOI of 5:1, with DMEM alone used  
610 for the control wells. The culture plates were then returned to the incubator at 37°C with  
611 5% CO<sub>2</sub> for 3 hours to allow for bacterial uptake by the RAW264.7 cells. The supernatant  
612 was removed after 3 hours, and the infected cells were washed with PBS to remove  
613 extracellular bacteria. Subsequently, the cells were incubated in fresh DMEM with 10%  
614 FCS for 24 hours and 48 hours. For harvesting, 400 µl of TRIzol (ThermoFisher Scientific,  
615 Waltham, USA) was added to the wells at each time point, and the adherent cells were  
616 scraped out and stored at -80°C for RNA extraction. Each bacterial infection was performed  
617 in triplicate, in addition to the non-infected controls. RNA was isolated from the samples

618 using the Direct-zol™ RNA Miniprep kit (Zymo Research, Irvine, USA) according to the  
619 manufacturer's instructions.

620 An Agilent RNA 6000 Nano kit was used to check the quality and quantity of the total  
621 RNA. The NanoString murine nCounter Myeloid Innate Immunity Gene Expression Panel  
622 (NanoString Technologies, USA) was used to assess transcript abundance across infections  
623 and time points using the nCounter MAX Analysis System (NanoString Technologies,  
624 Seattle, USA). The counts obtained were normalized using the nSolver™ Advanced  
625 Analysis plugin (NanoString Technologies, Seattle, USA) using the geNorm algorithm,  
626 and differential gene (DE) expression was analyzed using multivariate linear regression in  
627 nSolver™ software, with 0.05 as the p-value cutoff.

628

629 **Thin-layer chromatography analysis of lipooligosaccharides in *M. riyadhense*, *M.***  
630 ***kansasii* and *M. marinum***

631 For TLC analysis, mycobacterial strains were grown at 30°C (*M. marinum*) or 37°C  
632 (*M. smegmatis*, *M. kansasii*, *M. riyadhense*) on LJ slants, and after sufficient incubation,  
633 grown cells were collected and washed once with PBS. Apolar and polar lipids were  
634 extracted from the cell pellets using methods described by Dobson *et al*[64]. Polar lipids  
635 were analyzed by 2D-TLC using solvent system E, which is designed to separate  
636 phospholipids and LOSs[64]. Glycolipids were visualized by charring following staining  
637 with either molybdophosphoric acid (MPA) or alpha-naphthol (for glycolipids).

638

639 **Diagnostic PCR markers for *M. riyadhense***



640 To develop diagnostic markers for *M. riyadhense* for potential use in clinical diagnosis  
641 as well as environmental and animal studies, unique regions within the *M. riyadhense*  
642 reference genome compared to that of 152 other mycobacterial species were detected using  
643 Shustring[93]. These regions were also examined by Proteinortho[82] and Blastn[94].  
644 *mr\_00036*, *mr\_00263*, *mr\_00606*, and *mr\_01005* were selected as the amplification targets.  
645 Two primers for each gene were designed in this study:

646 MRDP-MR\_00036-F (5'-TTCGTTGTCGGTTTCGTCGC-3') and MRDP-  
647 MR\_00036-R (5'-GCGTCAGCTCCACCGAAAAC-3');

648 MRDP-MR\_00263-F (5'-CCACCGCTGTTGGCGA-3') and MRDP-MR\_00263-R  
649 (5'-TTCGTCCCGTTGATCCCGTT-3');

650 MRDP-MR\_00606-F (5'-AACCTGCCCGATACGCACTT-3') and MRDP-  
651 MR\_00606-R (5'-ACTGTTCTCCGTGGGGTTG-3');

652 MRDP-MR\_01005-F (5'-GACTGTGGGGTAACGGTGGA-3') and MRDP-  
653 MR\_01005-R (5'-CCGGTGATGTCGCCTACTCC-3').

654 PCR was performed in a 25 µl reaction volume with 12.5 µl of GoTaq® Green Master  
655 Mix (Promega, USA), 1 µl of 100 ng/µl gDNA, 1 µl with 10 nmol of forward and reverse  
656 primers, 3 µl of dimethyl sulfoxide (DMSO) and 19 µl of nuclease-free water. The PCR  
657 mixture was denatured for 5 minutes at 94°C; followed by 35 cycles of amplification  
658 involving a denaturation step at 94°C for 30 seconds, a primer annealing step at 59°C for  
659 45 seconds, and a primer extension step at 72°C for 45 seconds; and a final extension step  
660 at 72°C for 7 minutes. The ITS-F/mycom-2 primer set[95], which is a *Mycobacterium*  
661 genus-specific primer set, was used as a control, with amplification conditions as described

662 previously[95]. The products were electrophoresed in a 2% agarose gel for 60 minutes and  
663 visualized.

664

## 665 **Acknowledgements**

666 We wish to thank members of the Biological Core Lab (BCL) of King Abdullah  
667 University of Science and Technology for sequencing the bacterial genomic DNAs on the  
668 Illumina HiSeq 4000 and PacBio RSII platforms.

669

## 670 **Accession codes**

671 The *M. riyadhense* dataset is available at European Nucleotide Archive (ENA) under  
672 the study accession no. PRJEB32162. The assemblies are available with DOI  
673 10.5281/zenodo.2873972.

674

## 675 **Financial Disclosure Statement**

676 Work in AP's laboratory is supported by the KAUST faculty baseline fund (BAS/1/1020-  
677 01- 01). Work in SG and AB's laboratory was supported in part by BBSRC award  
678 BB/N004574/1.

679

## 680 **Conflicts of interest**

681 The authors have no conflicts of interest to declare.

682

## 683 **Author contribution statement**

684 AP conceived the comparative genomics part of the study, obtained the funding and  
685 supervised the work; MG and AH conceived the clinical part of the study; MG and FA  
686 wrote the clinical part of the text; FA, MG, TA, SF, AH, MAR, AR, and TS collected the  
687 microbiological and clinical information; and AP, QG, SG, AB, and FA designed the  
688 experiments. QG performed the data analysis and prepared the initial draft of the  
689 manuscript, followed by edits from AP, SG, MG, SF, AB and CM. QG, SM, ASm and JB  
690 performed the transcriptome experiment. ASi and AB performed the TLC analysis. CN  
691 and YS provided materials for the diagnostic markers and intellectual advice. All authors  
692 have commented on various sections of the manuscript, which were finally curated and  
693 incorporated in the final version by QG and AP.

694

## 695 **References**

- 696 1. Falkinham JO. Ecology of nontuberculous mycobacteria-where do human  
697 infections come from? *Semin Respir Crit Care Med.* 2013;34: 95–102.  
698 doi:10.1055/s-0033-1333568
- 699 2. van Ingen J, Al-Haijaj SAM, Boeree M, Al-Rabiah F, Enaimi M, de Zwaan R, et  
700 al. *Mycobacterium riyadhense* sp. nov., a non-tuberculous species identified as  
701 *Mycobacterium tuberculosis* complex by a commercial line-probe assay. *Int J Syst*  
702 *Evol Microbiol.* 2009;59: 1049–1053. doi:10.1099/ijs.0.005629-0

- 703 3. Ding L-W, Lai C-C, Lee L-N, Huang L-M, Hsueh P-R. Lymphadenitis caused by  
704 non-tuberculous mycobacteria in a university hospital in Taiwan: predominance  
705 of rapidly growing mycobacteria and high recurrence rate. *J Formos Med Assoc.*  
706 2005;104: 897–904.
- 707 4. Panwalker AP, Fuhse E. Nosocomial *Mycobacterium gordonae* pseudoinfection  
708 from contaminated ice machines. *Infect Control.* 1986;7: 67–70.  
709 doi:10.1017/S0195941700063918
- 710 5. Carbonne A, Brossier F, Arnaud I, Bougmiza I, Caumes E, Meningaud JP, et al.  
711 Outbreak of nontuberculous mycobacterial subcutaneous infections related to  
712 multiple mesotherapy injections. *J Clin Microbiol.* 2009;47: 1961–1964.  
713 doi:10.1128/JCM.00196-09
- 714 6. Singh J, O'Donnell K, Ashouri N, Adler-Shohet FC, Nieves D, Tran MT, et al.  
715 926. Outbreak of Invasive Nontuberculous *Mycobacterium* (NTM) Infections  
716 Associated With a Pediatric Dental Practice . *Open Forum Infect Dis.* 2018;5:  
717 S29–S29. doi:10.1093/ofid/ofy209.067

- 718 7. Garbati, Hakawi AM. Mycobacterium Riyadhense Lung Infection in a Patient with  
719 HIV/AIDS [Internet]. Sub-Saharan African Journal of Medicine. 2014. Available:  
720 [http://www.ssajm.org/article.asp?issn=2384-](http://www.ssajm.org/article.asp?issn=2384-5147;year=2014;volume=1;issue=1;spage=56;epage=58;aulast=Garbati)  
721 [5147;year=2014;volume=1;issue=1;spage=56;epage=58;aulast=Garbati](http://www.ssajm.org/article.asp?issn=2384-5147;year=2014;volume=1;issue=1;spage=56;epage=58;aulast=Garbati)
- 722 8. Choi JI, Lim JH, Kim SR, Lee SH, Park JS, Seo KW, et al. Lung infection caused  
723 by Mycobacterium riyadhense confused with Mycobacterium tuberculosis: The  
724 first case in Korea. Ann Lab Med. 2012;32: 298–303.  
725 doi:10.3343/alm.2012.32.4.298
- 726 9. King HC, Khera-Butler T, James P, Oakley BB, Erenso G, Aseffa A, et al.  
727 Environmental reservoirs of pathogenic mycobacteria across the Ethiopian  
728 biogeographical landscape. PLoS One. 2017;12.  
729 doi:10.1371/journal.pone.0173811
- 730 10. Narendrula-Kotha R, Nkongolo KK. Microbial response to soil liming of damaged  
731 ecosystems revealed by pyrosequencing and phospholipid fatty acid analyses. PLoS  
732 One. 2017;12. doi:10.1371/journal.pone.0168497

- 733 11. Godreuil S, Marchandin H, Michon AL, Ponsada M, Chyderiotis G, Brisou P, et  
734 al. *Mycobacterium riyadhense* pulmonary infection, France and Bahrain. *Emerging*  
735 *Infectious Diseases*. 2012. pp. 176–178. doi:10.3201/eid1801.110751
- 736 12. Van der Werf, Marieke J. Ködmön, Csaba Katalinić-Janković, Vera Kummik,  
737 Tiina Soini, Hanna Richter,E, et al. Inventory study of non-tuberculous  
738 mycobacteria in the European Union. *BMC Infect Dis*. 2014;14. doi:10.1186/1471-  
739 2334-14-62
- 740 13. Althawadi S, Johani S, Fernandez GM, Al-ghafli H, Enani RMA, Abdul K, et al.  
741 *Mycobacterium riyadhense*. 2017;23: 2015–2017.
- 742 14. Tortoli E, Pecorari M, Fabio G, Messinò M, Fabio A. Commercial DNA probes for  
743 mycobacteria incorrectly identify a number of less frequently encountered species.  
744 *Journal of Clinical Microbiology*. 2010. pp. 307–310. doi:10.1128/JCM.01536-09
- 745 15. Murty DS PK. A Brief review on Ecology and Evolution of Mycobacteria.  
746 *Mycobact Dis*. 2014;04. doi:10.4172/2161-1068.1000172

- 747 16. Jang J, Becq J, Gicquel B, Deschavanne P, Neyrolles O. Horizontally acquired  
748 genomic islands in the tubercle bacilli. *Trends Microbiol.* 2008;16: 303–308.  
749 doi:10.1016/j.tim.2008.04.005
- 750 17. Supply P, Marceau M, Mangenot S, Roche D, Rouanet C, Khanna V, et al.  
751 Genomic analysis of smooth tubercle bacilli provides insights into ancestry and  
752 pathoadaptation of *Mycobacterium tuberculosis*. *Nat Genet.* 2013;45: 172–179.  
753 doi:10.1038/ng.2517
- 754 18. Van Soolingen D, Hoogenboezem T, De Haas PEW, Hermans PWM, Koedam  
755 MA, Teppema KS, et al. A Novel Pathogenic Taxon of the *Mycobacterium*  
756 *tuberculosis* Complex, *Canetti*: Characterization of an Exceptional Isolate from  
757 Africa. *Int J Syst Bacteriol.* 1997;47: 1236–1245. doi:10.1099/00207713-47-4-  
758 1236
- 759 19. Blouin Y, Hauck Y, Soler C, Fabre M, Vong R, Dehan C, et al. Significance of the  
760 Identification in the Horn of Africa of an Exceptionally Deep Branching

- 761            *Mycobacterium tuberculosis* Clade. PLoS One. 2012;7: e52841.
- 762            doi:10.1371/journal.pone.0052841
- 763    20.    Wang J, McIntosh F, Radomski N, Dewar K, Simeone R, Enninga J, et al. Insights
- 764            on the emergence of *Mycobacterium tuberculosis* from the analysis of
- 765            *Mycobacterium kansasii*. Genome Biol Evol. 2015;7: 856–870.
- 766            doi:10.1093/gbe/evv035
- 767    21.    Stinear TP, Seemann T, Harrison PF, Jenkin G a, Davies JK, Johnson PDR, et al.
- 768            Insights from the complete genome sequence of *Mycobacterium marinum* on the
- 769            evolution of *Mycobacterium tuberculosis*. Genome Res. 2008;18: 729–41.
- 770            doi:10.1101/gr.075069.107
- 771    22.    Tortoli E, Fedrizzi T, Meehan CJ, Trovato A, Grottola A, Giacobazzi E, et al. The
- 772            new phylogeny of the genus *Mycobacterium*: The old and the news. Infect Genet
- 773            Evol. 2017;56: 19–25. doi:10.1016/j.meegid.2017.10.013
- 774    23.    Brown-Elliott BA, Simmer PJ, Trovato A, Hyle EP, Droz S, Buckwalter SP, et al.
- 775            *Mycobacterium decipiens* sp. nov., a new species closely related to the



- 776           Mycobacterium tuberculosis complex. *Int J Syst Evol Microbiol.* 2018;68: 3557–  
777           3562. doi:10.1099/ijsem.0.003031
- 778   24.   Saito H, Iwamoto T, Ohkusu K, Otsuka Y, Akiyama Y, Sato S, et al.  
779           Mycobacterium shinjukuense sp. nov., a slowly growing, non-chromogenic species  
780           isolated from human clinical specimens. *Int J Syst Evol Microbiol.* 2011;61: 1927–  
781           1932. doi:10.1099/ijs.0.025478-0
- 782   25.   Fedrizzi T, Meehan CJ, Grottola A, Giacobazzi E, Fregni Serpini G, Tagliazucchi  
783           S, et al. Genomic characterization of Nontuberculous Mycobacteria. *Sci Rep.*  
784           2017;7. doi:10.1038/srep45258
- 785   26.   Krumstiek J, Arnold R, Rattei T. Gepard: A rapid and sensitive tool for creating  
786           dotplots on genome scale. *Bioinformatics.* 2007;23: 1026–1028.  
787           doi:10.1093/bioinformatics/btm039
- 788   27.   Cole ST, Brosch R, Parkhill J, Garnier T, Churcher C, Harris D, et al. Deciphering  
789           the biology of mycobacterium tuberculosis from the complete genome sequence.  
790           *Nature.* 1998. pp. 537–544. doi:10.1038/31159

- 791 28. Hurtado UA, Solano JS, Rodriguez A, Robledo J, Rouzaud F. Draft Genome  
792 Sequence of a *Mycobacterium africanum* Clinical Isolate from Antioquia,  
793 Colombia. *Genome Announc.* 2016;4: e00486--16. doi:10.1128/genomeA.00486-  
794 16
- 795 29. de la Fuente J, Díez-Delgado I, Contreras M, Vicente J, Cabezas-Cruz A,  
796 Manrique M, et al. Complete Genome Sequences of Field Isolates of  
797 *Mycobacterium bovis* and *Mycobacterium caprae*. *Genome Announc.* 2015;3:  
798 e00247-15. doi:10.1128/genomeA.00247-15
- 799 30. Wang J, McIntosh F, Radomski N, Dewar K, Simeone R, Enninga J, et al. Insights  
800 on the emergence of *Mycobacterium tuberculosis* from the analysis of  
801 *Mycobacterium kansasii*. *Genome Biol Evol.* 2015;7: 856–870.  
802 doi:10.1093/gbe/evv035
- 803 31. Weerdenburg EM, Abdallah AM, Rangkuti F, El Ghany MA, Otto TD, Adroub  
804 SA, et al. Genome-wide transposon mutagenesis indicates that *Mycobacterium*

- 805 marinum customizes its virulence mechanisms for survival and replication in  
806 different hosts. *Infect Immun.* 2015;83: 1778–1788. doi:10.1128/IAI.03050-14
- 807 32. Leon P, Virginia W, Patricia B. Molecular analysis of the linear 2.3 kb plasmid of  
808 maize mitochondria: Apparent capture of tRNA genes. *Nucleic Acids Res.*  
809 1989;17: 4089–4099. doi:10.1093/nar/17.11.4089
- 810 33. Kinashi H. Giant linear plasmids in *Streptomyces*: A treasure trove of antibiotic  
811 biosynthetic clusters. *Journal of Antibiotics.* 2011. pp. 19–25.  
812 doi:10.1038/ja.2010.146
- 813 34. Crespi M, Messens E, Caplan AB, van Montagu M, Desomer J. Fasciation  
814 induction by the phytopathogen *Rhodococcus fascians* depends upon a linear  
815 plasmid encoding a cytokinin synthase gene. *EMBO J.* 1992;11: 795–804.  
816 Available:  
817 <http://www.ncbi.nlm.nih.gov/pmc/articles/PMC556518/>  
818 pi et al. - 1992 - Fasciation induction by the phytopathogen *Rhodococ.pdf*

- 819 35. Picardeau M, Vincent V. Characterization of large linear plasmids in  
820 mycobacteria. *J Bacteriol.* 1997;179: 2753–2756. doi:10.1128/jb.179.8.2753-  
821 2756.1997
- 822 36. Surtees JA, Funnell BE. Plasmid and Chromosome Traffic Control: How ParA and  
823 ParB Drive Partition. *Curr Top Dev Biol.* 2003;56: 145–180. doi:10.1016/S0070-  
824 2153(03)01010-X
- 825 37. Zrimec J, Lapanje A. DNA structure at the plasmid origin-of-Transfer indicates its  
826 potential transfer range. *Sci Rep.* 2018;8. doi:10.1038/s41598-018-20157-y
- 827 38. Ummels R, Abdallah AM, Kuiper V, Aâjoud A, Sparrius M, Naeem R, et al.  
828 Identification of a novel conjugative plasmid in mycobacteria that requires both  
829 type IV and type VII secretion. *MBio.* 2014;5. doi:10.1128/mBio.01744-14
- 830 39. Uchiya KI, Takahashi H, Nakagawa T, Yagi T, Moriyama M, Inagaki T, et al.  
831 Characterization of a novel plasmid, pMAH135, from *Mycobacterium avium*  
832 subsp. *hominissuis*. *PLoS One.* 2015;10. doi:10.1371/journal.pone.0117797

- 833 40. da Silva Rabello MC, Matsumoto CK, de Almeida LGP, Menendez MC, de  
834 Oliveira RS, Silva RM, et al. First description of natural and experimental  
835 conjugation between mycobacteria mediated by a linear plasmid. PLoS One.  
836 2012;7. doi:10.1371/journal.pone.0029884
- 837 41. Kim B-J, Kim B-R, Lee S-Y, Seok S-H, Kook Y-H, Kim B-J. Whole-Genome  
838 Sequence of a Novel Species, *Mycobacterium yongonense* DSM 45126 T.  
839 Genome Announc. 2013;1: 604–13. doi:10.1128/genomeA.00604-13
- 840 42. Veyrier F, Pletzer D, Turenne C, Behr MA. Phylogenetic detection of horizontal  
841 gene transfer during the step-wise genesis of *Mycobacterium tuberculosis*. BMC  
842 Evol Biol. 2009;9. doi:10.1186/1471-2148-9-196
- 843 43. van Ingen J, Kohl TA, Kranzer K, Hasse B, Keller PM, Katarzyna Szafrńska A, et  
844 al. Global outbreak of severe *Mycobacterium chimaera* disease after cardiac  
845 surgery: a molecular epidemiological study. Lancet Infect Dis. 2017;17: 1033–  
846 1041. doi:10.1016/S1473-3099(17)30324-9

- 847 44. Morgado SM, Marín MA, Freitas FS, Fonseca EL, Vicente ACP. Complete  
848 plasmid sequence carrying type IV-like and type VII secretion systems from an  
849 atypical mycobacteria strain. *Mem Inst Oswaldo Cruz*. 2017;112: 514–516.  
850 doi:10.1590/0074-02760160546
- 851 45. Houben ENG, Korotkov K V., Bitter W. Take five - Type VII secretion systems of  
852 Mycobacteria. *Biochim Biophys Acta - Mol Cell Res*. 2014;1843: 1707–1716.  
853 doi:10.1016/j.bbamcr.2013.11.003
- 854 46. Abdallah A, Pittius G, Nicolaas C, DiGiuseppe Champion P, Cox J, Luirink J, et  
855 al. Type VII secretion - Mycobacteria show the way. *Nat Rev Microbiol*. 2007;5:  
856 883–891. doi:10.1038/nrmicro1773
- 857 47. Weerdenburg EM, Abdallah AM, Mitra S, De Punder K, Van der Wel NN, Bird S,  
858 et al. ESX-5-deficient *Mycobacterium marinum* is hypervirulent in adult zebrafish.  
859 *Cell Microbiol*. 2012;14: 728–739. doi:10.1111/j.1462-5822.2012.01755.x
- 860 48. Jia X, Yang L, Dong M, Chen S, Lv L, Cao D, et al. The Bioinformatics Analysis  
861 of Comparative Genomics of *Mycobacterium tuberculosis* Complex (MTBC)

- 862 Provides Insight into Dissimilarities between Intraspecific Groups Differing in  
863 Host Association, Virulence, and Epitope Diversity. *Front Cell Infect Microbiol.*  
864 2017;7. doi:10.3389/fcimb.2017.00088
- 865 49. Mahairas GG, Sabo PJ, Hickey MJ, Singh DC, Stover CK. Molecular analysis of  
866 genetic differences between *Mycobacterium bovis* BCG and virulent *M. bovis*. *J*  
867 *Bacteriol.* 1996;178: 1274–1282. doi:10.1128/jb.178.5.1274-1282.1996
- 868 50. Gordon S V., Brosch R, Billault A, Garnier T, Eiglmeier K, Cole ST. Identification  
869 of variable regions in the genomes of tubercle bacilli using bacterial artificial  
870 chromosome arrays. *Mol Microbiol.* 1999;32: 643–655. doi:10.1046/j.1365-  
871 2958.1999.01383.x
- 872 51. Van Ingen J, De Zwaan R, Dekhuijzen R, Boeree M, Van Soolingen D. Region of  
873 difference 1 in nontuberculous *Mycobacterium* species adds a phylogenetic and  
874 taxonomical character. *J Bacteriol.* 2009;191: 5865–5867. doi:10.1128/JB.00683-  
875 09

- 876 52. Kozak RA, Alexander DC, Liao R, Sherman DR, Behr MA. Region of difference 2  
877 contributes to virulence of mycobacterium tuberculosis. *Infect Immun.* 2011;79:  
878 59–66. doi:10.1128/IAI.00824-10
- 879 53. Ru H, Liu X, Lin C, Yang J, Chen F, Sun R, et al. The Impact of Genome Region  
880 of Difference 4 (RD4) on Mycobacterial Virulence and BCG Efficacy. *Front Cell*  
881 *Infect Microbiol.* 2017;7. doi:10.3389/fcimb.2017.00239
- 882 54. Brosch R, Gordon S V., Marmiesse M, Brodin P, Buchrieser C, Eiglmeier K, et al.  
883 A new evolutionary scenario for the Mycobacterium tuberculosis complex. *Proc*  
884 *Natl Acad Sci.* 2002;99: 3684–3689. doi:10.1073/pnas.052548299
- 885 55. Alexander KA, Laver PN, Michel AL, Williams M, van Helden PD, Warren RM,  
886 et al. Novel mycobacterium tuberculosis complex pathogen, *M. Mungi*. *Emerg*  
887 *Infect Dis.* 2010;16: 1296–1299. doi:10.3201/eid1608.100314
- 888 56. M Cristina G, Brisse S, Brosch R, Fabre M, Omaïs B, Marmiesse M, et al. Ancient  
889 origin and gene mosaicism of the progenitor of Mycobacterium tuberculosis. *PLoS*  
890 *Pathog.* 2005;1: 0055–0061. doi:10.1371/journal.ppat.0010005



- 891 57. Delogu G, Brennan MJ. Comparative Immune Response to PE and PE \_ PGRS  
892 Antigens of Mycobacterium tuberculosis Comparative Immune Response to PE  
893 and PE \_ PGRS Antigens of Mycobacterium tuberculosis. Infect Immun. 2001;69:  
894 5606–5611. doi:10.1128/IAI.69.9.5606
- 895 58. Isom GL, Davies NJ, Chong ZS, Bryant JA, Jamshad M, Sharif M, et al. MCE  
896 domain proteins: Conserved inner membrane lipid-binding proteins required for  
897 outer membrane homeostasis. Sci Rep. 2017;7. doi:10.1038/s41598-017-09111-6
- 898 59. Newton-Foot M, Warren RM, Sampson SL, Van Helden PD, Gey Van Pittius NC.  
899 The plasmid-mediated evolution of the mycobacterial ESX (Type VII) secretion  
900 systems. BMC Evol Biol. 2016;16. doi:10.1186/s12862-016-0631-2
- 901 60. Slayden RA, Dawson CC, Cummings JE. Toxin-antitoxin systems and regulatory  
902 mechanisms in Mycobacterium tuberculosis. Pathogens and Disease. 2018.  
903 doi:10.1093/femspd/fty039

- 904 61. Cooper TF, Heinemann JA. Postsegregational killing does not increase plasmid  
905 stability but acts to mediate the exclusion of competing plasmids. *Proc Natl Acad*  
906 *Sci.* 2000;97: 12643–12648. doi:10.1073/pnas.220077897
- 907 62. Van Der Woude AD, Sarkar D, Bhatt A, Sparrius M, Raadsen SA, Boon L, et al.  
908 Unexpected link between lipooligosaccharide biosynthesis and surface protein  
909 release in *Mycobacterium marinum*. *J Biol Chem.* 2012;287: 20417–20429.  
910 doi:10.1074/jbc.M111.336461
- 911 63. Boritsch EC, Frigui W, Cascioferro A, Malaga W, Etienne G, Laval F, et al. Pks5-  
912 recombination-mediated surface remodelling in *Mycobacterium tuberculosis*  
913 emergence. *Nat Microbiol.* 2016;1. doi:10.1038/nmicrobiol.2015.19
- 914 64. G.Dobson., D.E.Minnikin., S.M.Minnikin., M.Parlett., M.Goodfellow., M.Ridell.,  
915 et al. Systematic analysis of complex mycobacterial lipids. *Chemical Methods in*  
916 *Bacterial Systematics.* Academic Press, London, United Kingdom.; 1985. pp. 237–  
917 265.

- 918 65. Cohen I, Parada C, Acosta-Gío E, Espitia C. The PGRS domain from PE\_PGRS33  
919 of *Mycobacterium tuberculosis* is target of humoral immune response in mice and  
920 humans. *Front Immunol.* 2014;5: 1–9. doi:10.3389/fimmu.2014.00236
- 921 66. Boritsch EC, Supply P, Honoré N, Seeman T, Stinear TP, Brosch R. A glimpse  
922 into the past and predictions for the future: The molecular evolution of the  
923 tuberculosis agent. *Molecular Microbiology.* 2014. pp. 835–852.  
924 doi:10.1111/mmi.12720
- 925 67. Geiss GK, Bumgarner RE, Birditt B, Dahl T, Dowidar N, Dunaway DL, et al.  
926 Direct multiplexed measurement of gene expression with color-coded probe pairs.  
927 *Nat Biotechnol.* 2008;26: 317–325. doi:10.1038/nbt1385
- 928 68. Bowdish DME, Sakamoto K, Kim MJ, Kroos M, Mukhopadhyay S, Leifer CA, et  
929 al. MARCO, TLR2, and CD14 are required for macrophage cytokine responses to  
930 mycobacterial trehalose dimycolate and *Mycobacterium tuberculosis*. *PLoS*  
931 *Pathog.* 2009;5. doi:10.1371/journal.ppat.1000474

- 932 69. Fujita Y, Naka T, McNeil MR, Yano I. Intact molecular characterization of cord  
933 factor (trehalose 6,6'-dimycolate) from nine species of mycobacteria by MALDI-  
934 TOF mass spectrometry. *Microbiology*. 2005;151: 3403–3416.  
935 doi:10.1099/mic.0.28158-0
- 936 70. Stavrum R, Stavrum AK, Valvatne H, Riley LW, Ulvestad E, Jonassen I, et al.  
937 Modulation of transcriptional and inflammatory responses in murine macrophages  
938 by the Mycobacterium tuberculosis Mammalian cell entry (Mce) 1 complex. *PLoS*  
939 *One*. 2011;6. doi:10.1371/journal.pone.0026295
- 940 71. Katoch VM. Infections due to non-tuberculous mycobacteria (NTM). *Indian*  
941 *Journal of Medical Research*. 2004. pp. 290–304. doi:10.1016/j.phrs.2009.12.004
- 942 72. Griffith DE, Aksamit T, Brown-Elliott B a., Catanzaro A, Daley C, Gordin F, et al.  
943 An Official ATS/IDSA Statement: Diagnosis, Treatment, and Prevention of  
944 Nontuberculous Mycobacterial Diseases. *Am J Respir Crit Care Med*. 2007;175:  
945 367–416. doi:10.1164/rccm.200604-571ST

- 946 73. Sapriel G, Brosch R. Shared pathogenomic patterns characterize a new phylotype,  
947 revealing transition towards host-adaptation long before speciation of  
948 *Mycobacterium tuberculosis*. *Genome Biol Evol.* 2019;11: 2420–2438.  
949 doi:10.1093/gbe/evz162
- 950 74. Becq J, Gutierrez MC, Rosas-Magallanes V, Rauzier J, Gicquel B, Neyrolles O, et  
951 al. Contribution of horizontally acquired genomic islands to the evolution of the  
952 tubercle bacilli. *Mol Biol Evol.* 2007;24: 1861–1871.  
953 doi:10.1093/molbev/msm111
- 954 75. Jamwal S V., Mehrotra P, Singh A, Siddiqui Z, Basu A, Rao KVS. Mycobacterial  
955 escape from macrophage phagosomes to the cytoplasm represents an alternate  
956 adaptation mechanism. *Sci Rep.* 2016;6. doi:10.1038/srep23089
- 957 76. Belisle JT, Sonnenberg MG. Isolation of genomic DNA from mycobacteria.  
958 *Methods Mol Biol.* 1998;101: 31–44. doi:10.1385/0-89603-471-2:31

- 959 77. Bolger AM, Lohse M, Usadel B. Trimmomatic: A flexible trimmer for Illumina  
960 sequence data. *Bioinformatics*. 2014;30: 2114–2120.  
961 doi:10.1093/bioinformatics/btu170
- 962 78. Koren S, Walenz BP, Berlin K, Miller JR, Bergman NH, Phillippy AM. Canu:  
963 Scalable and accurate long-read assembly via adaptive  $\kappa$ -mer weighting and repeat  
964 separation. *Genome Res*. 2017;27: 722–736. doi:10.1101/gr.215087.116
- 965 79. Walker BJ, Abeel T, Shea T, Priest M, Abouelliel A, Sakthikumar S, et al. Pilon:  
966 An integrated tool for comprehensive microbial variant detection and genome  
967 assembly improvement. *PLoS One*. 2014;9. doi:10.1371/journal.pone.0112963
- 968 80. Seemann T. Prokka: Rapid prokaryotic genome annotation. *Bioinformatics*.  
969 2014;30: 2068–2069. doi:10.1093/bioinformatics/btu153
- 970 81. Alikhan NF, Petty NK, Ben Zakour NL, Beatson SA. BLAST Ring Image  
971 Generator (BRIG): Simple prokaryote genome comparisons. *BMC Genomics*.  
972 2011;12. doi:10.1186/1471-2164-12-402

- 973 82. Lechner M, Findeiß S, Steiner L, Marz M, Stadler PF, Prohaska SJ. Proteinortho:  
974 Detection of (Co-)orthologs in large-scale analysis. *BMC Bioinformatics*. 2011;  
975 doi:10.1186/1471-2105-12-124
- 976 83. Ihaka R, Gentleman R. R: A Language for Data Analysis and Graphics. *J Comput*  
977 *Graph Stat*. 1996;5: 299–314. doi:10.1080/10618600.1996.10474713
- 978 84. Li L, Stoeckert CJ, Roos DS. OrthoMCL: Identification of ortholog groups for  
979 eukaryotic genomes. *Genome Res*. 2003;13: 2178–2189. doi:10.1101/gr.1224503
- 980 85. Li H, Durbin R. Fast and accurate short read alignment with Burrows-Wheeler  
981 transform. *Bioinformatics*. 2009;25: 1754–1760.  
982 doi:10.1093/bioinformatics/btp324
- 983 86. Broad Institute. Picard tools. In: <https://broadinstitute.github.io/picard/> [Internet].  
984 2016. Available:  
985 <https://broadinstitute.github.io/picard/%5Cnhttp://broadinstitute.github.io/picard/>
- 986 87. Alkan C, Coe BP, Eichler EE. GATK toolkit. *Nat Rev Genet*. 2011;12: 363–76.  
987 doi:10.1038/nrg2958

- 988 88. Naeem R, Hidayah L, Preston MD, Clark TG, Pain A. SVAMP: Sequence  
989 variation analysis, maps and phylogeny. *Bioinformatics*. 2014;30: 2227–2229.  
990 doi:10.1093/bioinformatics/btu176
- 991 89. Stamatakis A, Ludwig T, Meier H. RAxML-III: A fast program for maximum  
992 likelihood-based inference of large phylogenetic trees. *Bioinformatics*. 2005;21:  
993 456–463. doi:10.1093/bioinformatics/bti191
- 994 90. Segata N, Börnigen D, Morgan XC, Huttenhower C. PhyloPhlAn is a new method  
995 for improved phylogenetic and taxonomic placement of microbes. *Nat Commun*.  
996 2013; doi:10.1038/ncomms3304
- 997 91. Edgar RC. MUSCLE: a multiple sequence alignment method with reduced time  
998 and space complexity. *BMC Bioinformatics*. 2004;5: 113. doi:10.1186/1471-2105-  
999 5-113
- 1000 92. Capella-Gutiérrez S, Silla-Martínez JM, Gabaldón T. trimAl: A tool for automated  
1001 alignment trimming in large-scale phylogenetic analyses. *Bioinformatics*. 2009;25:  
1002 1972–1973. doi:10.1093/bioinformatics/btp348



- 1003 93. Haubold B, Pierstorff N, Möller F, Wiehe T. Genome comparison without  
1004 alignment using shortest unique substrings. *BMC Bioinformatics*. 2005;6.  
1005 doi:10.1186/1471-2105-6-123
- 1006 94. Camacho C, Coulouris G, Avagyan V, Ma N, Papadopoulos J, Bealer K, et al.  
1007 BLAST+: Architecture and applications. *BMC Bioinformatics*. 2009;10.  
1008 doi:10.1186/1471-2105-10-421
- 1009 95. Park H, Jang H, Kim C, Chung B, Chang CL, Soon Kew Park, et al. Detection and  
1010 identification of mycobacteria by amplification of the internal transcribed spacer  
1011 regions with genus- and species-specific PCR primers. *J Clin Microbiol*. 2000;38:  
1012 4080–4085.
- 1013
- 1014
- 1015
- 1016
- 1017

1018 **Figures**

| MR#    | Age (Years) | Gender | HIV status | Other co-morbid conditions             | Site(s) of the infection             | Smooth/Rough | Azithromycin-fluoroquinolone | Zurbit-Nevirapin | Therapy                                                                      |                                | Radiographic Location of lesion (Chest CT)                          | Baseline                        |                        | Treatment Outcome |
|--------|-------------|--------|------------|----------------------------------------|--------------------------------------|--------------|------------------------------|------------------|------------------------------------------------------------------------------|--------------------------------|---------------------------------------------------------------------|---------------------------------|------------------------|-------------------|
|        |             |        |            |                                        |                                      |              |                              |                  | Initial medication/duration                                                  | Continuous medication/duration |                                                                     | CD4 count (X10 <sup>6</sup> /L) | Viral load (Copies/mL) |                   |
| MR193  | 82          | M      | Unknown    | Smoking, DM, HTN, heart disease        | Pulmonary                            | R            | 4+                           | 2+               | NA                                                                           | NA                             | Left upper lobe consolidation                                       | NA                              | N/A                    | Died              |
| MR206  | 32          | M      | Negative   | Eisenmenger's syndrome; pulmonary HTN  | Pulmonary                            | R            | NA                           | 1+               | RIF/VM<br>CLR/VM<br>EMB/VM<br>INH/VM<br>PYZ/VM<br>RIF/VM<br>EMB/VM<br>CLR/VM | CLR/VM<br>EMB/VM               | Bilateral air space consolidation and nodular opacity               | NA                              | N/A                    | Survived          |
| MR210  | 66          | M      | Positive   | PCP co-infection                       | Pulmonary                            | S            | NA                           | Negative         | EMB/VM<br>CLR/VM<br>EMB/VM<br>IMP/VM                                         | NA                             | Bilateral ground glass opacities                                    | 0.7                             | 415,927                | Survived          |
| MR222  | 37          | M      | Positive   | Lymphoblastic lymphoma                 | Pulmonary, LN, Abdominal             | S            | NA                           | Negative         | EMB/VM<br>CLR/VM<br>IMP/VM                                                   | EMB/VM<br>IMP/VM               | Multiple lung lesions with central cavitation                       | 0                               | 838                    | Died              |
| MR226  | 8           | M      | Negative   | Free                                   | Pulmonary, LA                        | S            | NA                           | Negative         | NA                                                                           | NA                             | Multiple bilateral nodular infiltrates, more in the left upper lobe | NA                              | N/A                    | Survived          |
| MR244  | 28          | M      | Positive   | Pulmonary disease; hematologic disease | Pulmonary, LN, Abdominal, Peritoneal | S            | NA                           | 2+               | CLR/VM<br>RIF+INH/VM<br>EMB/VM<br>RIF/VM<br>CLR/VM<br>EMB/VM                 | MXF+VM                         | Multiple bilateral lung nodules; cavitation left lower lobe         | 0.02                            | 399,652                | Survived          |
| MR246  | 17          | M      | Negative   | Pulmonary disease; chronic diarrhea    | Pulmonary, Mediastinal LN            | S            | NA                           | Negative         | RIF/VM<br>CLR/VM<br>EMB/VM                                                   | NA                             | Left upper lobe consolidation                                       | NA                              | N/A                    | Survived          |
| MR1023 | 47          | M      | Negative   | DM, subclinical hypothyroidism         | Pulmonary                            | S            | NA                           | Negative         | NA                                                                           | NA                             | Bilateral nodular infiltrate, cavity, left upper lobe               | NA                              | N/A                    | Survived          |

1019

1020 **Fig 1. Clinical characteristics of the studies populations.**

1021

1022

1023

1024

1025

1026

1027

1028

1029

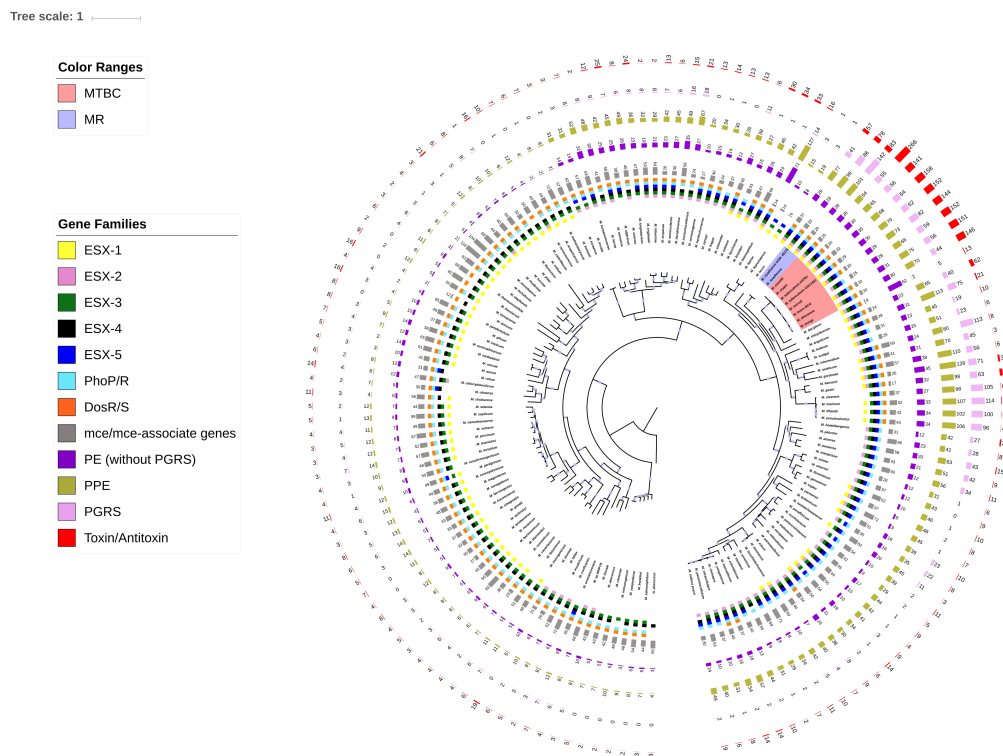

1030

1031 **Fig 2. A phylogenetic tree of 149 species of mycobacteria showing close relationship**

1032 **of *M. riadhense* and MTBC.** The phylogeny is constructed using 149 available

1033 genomes by concatenating and aligning amino acid positions across 400 shared proteins

1034 automatically identified in the chosen genomes by PhyloPhlAn2. The description of the

1035 gene families is listed on the left side. For details please refer to the Materials and

1036 Methods. Circles on each branch indicate the bootstrap values above 95%.

1037

1038

1039

1040

1041

1042

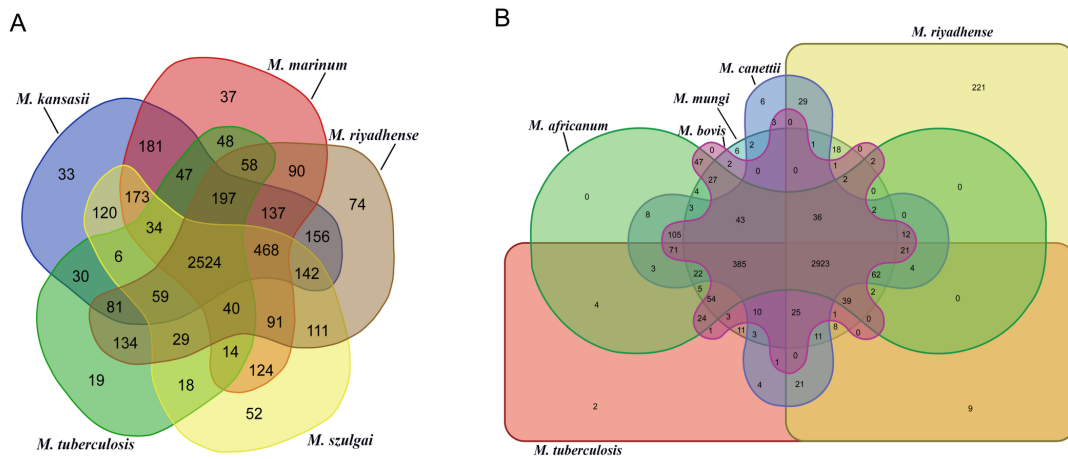

1043

1044 **Fig 3. Comparison of the shared and unique gene orthologs amongst selected**  
 1045 **mycobacteria.** Venn diagrams represent the overlap of gene orthologs between the (A)  
 1046 *M. riyadhense*, *M. tuberculosis* H37Rv, *M. marinum* M, *M. kansasii* 12478 and *M.*  
 1047 *szulgai* and (B) *M. riyadhense* MR226 and five species within the MTBC.

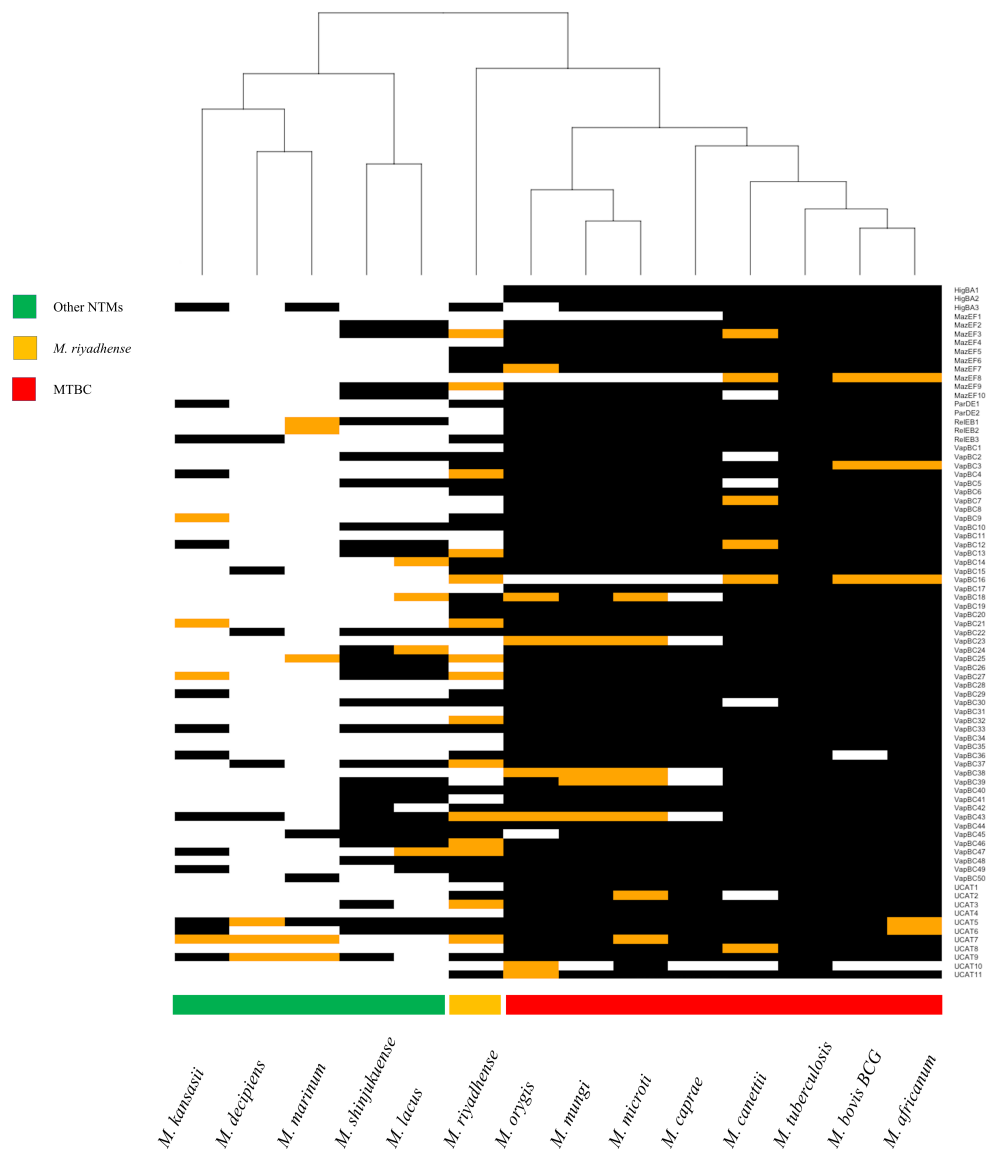

1048

1049 **Fig 4. A hierarchical clustering of the presence (black) and absence (white) of *M.***  
 1050 ***tuberculosis* H37Rv toxin/antitoxin orthologs in *M. riyadhense*, *M. marinum*, *M.***  
 1051 ***kansasii*, *M. shinjukuense*, *M. lacus*, *M. decipiens* and MTBC species. The orange**  
 1052 **blocks denote the presence of either the toxin or antitoxin gene ortholog in a given pair of**  
 1053 **the T/A system. The black and white blocks represent presence and absence respectively.**  
 1054 **The name of the T/A system are shown for each row on the right.**

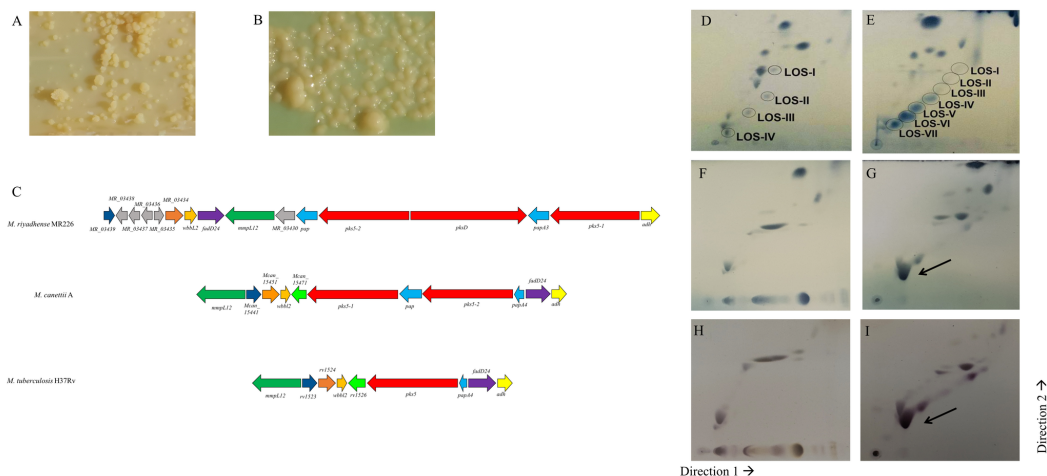

1055

1056 **Fig 5. LOS systems in *M. riyadhense* and other related mycobacteria and 2D-TLC**  
 1057 **analysis of polar lipids extracted from selected *M. riyadhense* strains.** (A) Rough-dry  
 1058 colony morphology (MR193) and (B) smooth morphology (MR226) of *M. riyadhense*.  
 1059 (C) Genetic locus map of the LOS biosynthesis gene cluster from *M. riyadhense*, *M.*  
 1060 *canettii* A and *M. tuberculosis* H37Rv (drawn to scale). The arrows show the direction of  
 1061 transcription and the genes are colored according to the orthologous relationships. Polar  
 1062 lipids from two known LOS producers, *M. marinum* (D) and *M. kansasii* (E), are  
 1063 included to illustrate the migration pattern of LOS species in System E. (F) 2D-TLC  
 1064 analysis of polar lipids extracted from select *M. riyadhense* rough strain or smooth (G)  
 1065 strain. A separate staining with alpha-naphthol also confirmed that this was a glycolipid  
 1066 species from the same (H) rough and (I) smooth strain. (D), (E), (F) and (G) were charred  
 1067 after staining with MPA, while (H) and (I) were charred after staining with alpha naphthol.  
 1068 LOS III from *M. riyadhense* is indicated by a solid arrow.

1069

1070

1071

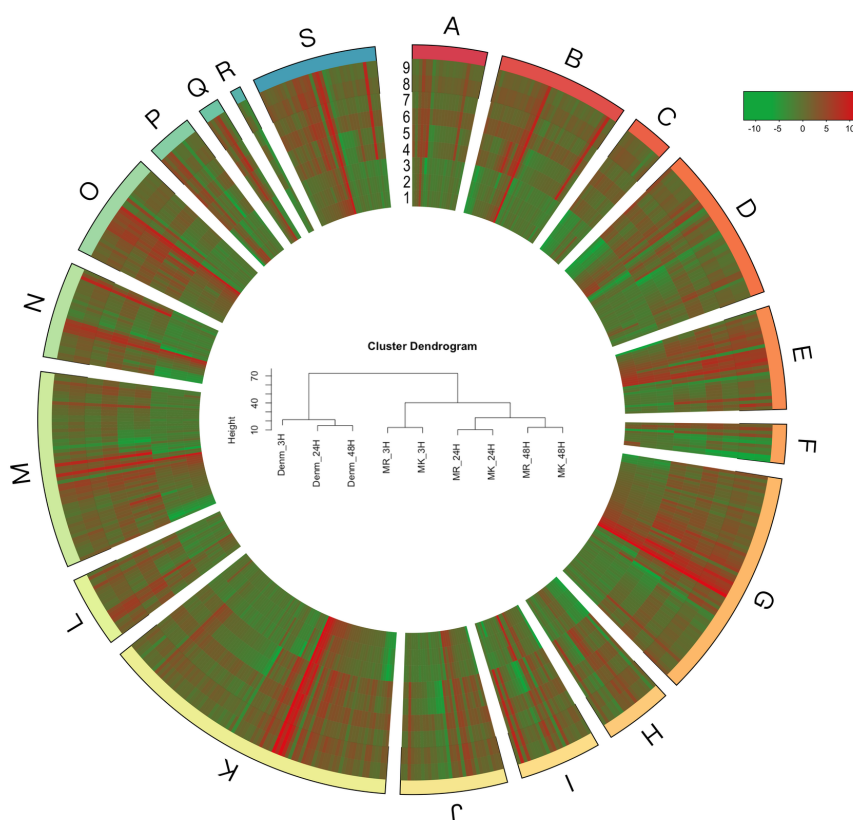

1072

1073 **Fig 6. A circular heatmap demonstrating the host gene expression patterns from the**  
1074 **RAW264.7 infections with *M. riyadhense* (MR), *M. kansasii* (MK) and *M. bovis* BCG**  
1075 **Denmark (Denm) over 3, 24 and 48 hours as determined by the Myeloid Innate**  
1076 **Immunity Gene Expression Panel (NanoString Technologies, USA). Data represent**  
1077 **Log<sub>2</sub>FC expression values compared to the uninfected control from each time point. The**  
1078 **gene sets of each clusters are: A: Angiogenesis; B: Antigen Presentation; C: Cell Cycle**  
1079 **and Apoptosis; D: Cell Migration and Adhesion; E: Chemokine signaling; F:**  
1080 **Complement Activation; G: Cytokine Signaling; H: Differentiation and Maintenance of**  
1081 **Myeloid Cells; I: ECM remodeling; J: Fc Receptor Signaling; K: Growth Factor**  
1082 **Signaling; L: Interferon Signaling; M: Lymphocyte activation; N: Metabolism; O:**  
1083 **Pathogen Response; P: T-cell Activation and Checkpoint Signaling; Q: TH1 Activation;**

1084 R: TH2 Activation; S: TLR signaling. The circles 1-9 represent RAW264.7 transcriptome  
1085 response upon infections of 1: Denm-3h; 2: Denm-24h; 3: Denm-48h; 4: MR-3h; 5: MK-  
1086 3h; 6: MR-24h; 7: MK-24h; 8: MR-48h; 9: MK-48h. The cluster dendrogram in the  
1087 middle show the hierarchical clustering of the individual gene expression datasets.

1088

1089

1090

1091

1092

1093

1094

1095

1096

1097

1098

1099

1100

1101

1102

1103

1104

1105

1106



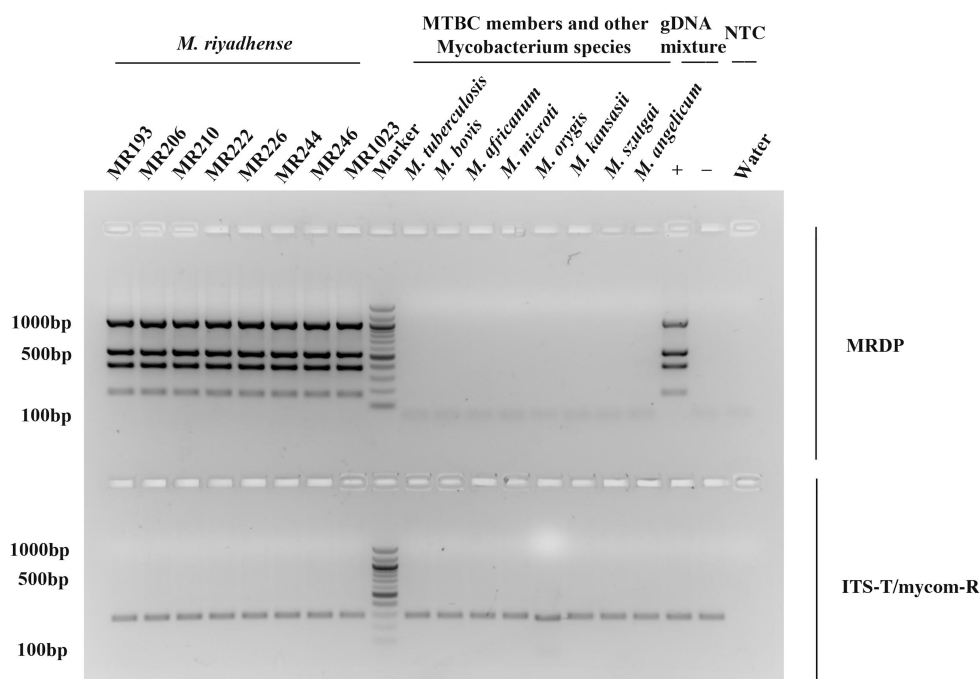

1107

1108 **Fig 7. Development of a rapid PCR-based diagnostic test for detection of *M.***

1109 ***riyadhense*.** Agarose gel (2%) electrophoresis patterns of the PCR products are shown as

1110 part of the diagnostic test for *M. riyadhense*. Lane M: DNA Marker, Lane 1-8: Varies *M.*

1111 *riyadhense* strains (From left to right: MR193, MR206, MR210, MR222, MR226,

1112 MR244, MR246, MR1023), Lane 9-16: Varies *Mycobacterium* species (From left to

1113 right: *M. tuberculosis*, *M. bovis*, *M. africanum*, *M. microti*, *M. oryis*, *M. kansasii*, *M.*

1114 *szulgai* and *M. angelicum*) templates, Template cocktail, mycobacterium species (*M.*

1115 *tuberculosis*, *M. bovis*, *M. kansasii*, *M. marinum*, *M. szulgai*, *M. avium* and *M.*  
1116 *angelicum*) with (Lane 17, +) and without (Lane 18,-) *M. riyadhense* MR226 gDNA  
1117 template. Lane 19: Non-template control (NTC). Upper Panel: MRDP (*M. riyadhense*  
1118 diagnostic marker) set. Lower Panel B: *Mycobacterium* genus specific primer ITS-T and  
1119 mycom-R amplified with mycobacterial gDNA.

1120

1121

1122

1123

1124

1125

1126

1127

1128

1129

1130

1131

1132

1133

1134

1135

1136

1137

## 1138 **Supporting Information**

### 1139 **S1 Fig. Axial enhanced CT scan image of the chest from the anonymous patient**

1140 **infected with *M. riyadhense* MR193.** Multifocal cavitating consolidation in both lungs  
1141 predominantly involving the left upper lobe associated with ill-defined ground-glass  
1142 centrilobular nodules and tree-in-bud appearance on both lungs were observed. The  
1143 findings were suggestive of tuberculosis.

### 1144 **S2 Fig. A comparison heatmap of predicted protein-coding gene orthologs from *M.***

1145 ***riyadhense* MR226 and other mycobacteria. The orthologs were determined by**

1146 **Proteinortho[82]. The black and white spaces denote presence and absences of an**

1147 **ortholog in a given species respectively.** (A) Comparison of chromosome-encoded

1148 genes in 152 mycobacterial species. The box with red outline highlights MTBC. The red

1149 arrows indicate the genomic regions that are absent in the assembly GCA\_002101845.1

1150 while present in our MR226 assembly. (B) Comparison of the linear plasmid pMRLP01-

1151 encoded genes in 152 mycobacterial species genome assemblies. The box b with red

1152 outline highlights a region which shared orthologs with pMRLP01 in *Mycobacterium*

1153 *tusciae*, *Mycobacterium aromaticivorans*, *Mycobacterium llatzerense*, *Mycobacterium*

1154 *obuense*, *Mycobacterium novocastrense* and *Mycobacterium holsaticum*. (C) Comparison

1155 of the circular plasmid pMR01-encoded 88 genes in 152 mycobacterial species genome

1156 assemblies. The box c with red outline highlights the cluster of the pRAW-like plasmids.

### 1157 **S3 Fig. Circular map of pMR01. The circles show from outside to inside (1-12)**

1158 **BlastN results against the pMR01 of various *Mycobacterium* plasmids. The**

1159 **corresponding plasmids used are listed on the right panel.** The innermost circle (13)

1160 represents pMR01 with the location of the predicted protein coding genes. Red colour

1161 indicates the location of the members of the *pe/ppe* gene family, blue indicates the *esx*-

1162 related genes and all the other predicted genes are colored in grey.

### 1163 **S4 Fig. Multiple alignment of 8 *M. riyadhense* assemblies using progressive Mauve.**

1164 (A) The alignment of the 8 assemblies and (B) the alignment of the linear and circular

1165 plasmids from 8 strains. Circular plasmid is present in 3 strains and highlighted by boxes

1166 with black outlines.

1167 **S5 Fig. Phylogenetic tree of *M. riyadhense* clinical isolates used in this study.** The *M.*  
1168 *riyadhense* phylogenetic tree was constructed with SNP data from 8 datasets called by  
1169 GATK pipeline by RaxML with the TVM model. The circles on each branch indicates  
1170 the bootstrap values (above 95%, 1,000 replicates).

1171 **S6 Fig. Genome alignments comparing selected Region of Differences (RDs) in**  
1172 **mycobacteria. The Artemis Comparison Tool (ACT) was used to compare and**  
1173 **visualize the annotated genome sequences against the chosen mycobacteria.** (A) The  
1174 RD2 region of *M. riyadhense* MR226, *M. tuberculosis* H37Rv and *M. bovis* BCG Pasteur  
1175 (B) The RD12 region of *M. tuberculosis*, *M. riyadhense* MR226 and *M. canettii* CIPT  
1176 140010059.

1177 **S7 Fig. The relative distribution of the functions of the predicted protein-encoding**  
1178 **genes were normalized by the genome size of each genome and compared to the *M.***  
1179 ***riyadhense* MR226 strain.**

1180 The phylogenomic position of *M. riyadhense* within the *Mycobacterium* genus was  
1181 determined by concatemer sequences of 906 shared single copy genes covering 296,124  
1182 amino acid positions. *Nocardia abscessus* was used as the out group. The concatenated  
1183 sequences were used to build the phylogenetic tree with the LG+G+F model, which was  
1184 selected by ModelGenerator. The phylogenetic tree was generated by RaxML with 1,000  
1185 iterations and the bootstrap values are shown above each branch.

1186 **S8 Fig. Genetic locus map of the *pe-pgrs33* gene cluster from *M. marinum*, *M.***  
1187 ***kansasii*, *M. riyadhense*, *M. canettii* and *M. tuberculosis* (drawn to scale).**

1188 The genes are shown with arrows and are colored according to the orthologs. The  
1189 deletion event was highlighted with red arrows while the insertion event in green arrows.

1190 **S9 Fig. Comparison of different gene clusters that encode type VII secretion systems**  
1191 **in the *M. riyadhense* MR226 strain.**

1192 The genes are shown with arrows and are colored according to the orthologs. The color  
1193 codes for the figure are presented in the key. The black arrows indicate region-specific  
1194 genes.

1195 **S10 Fig. TLR and NFkB pathway responses across the three infections.**

1196 Clustering of Nanostring data from infections with *M. riyadhense* (MR), *M. kansasii*  
1197 (MK) and *M. bovis* BCG Denmark (Denm) over 3, 24 and 48 hrs showed commonality  
1198 and variation in the transcriptional responses. Panel A and B show selected genes  
1199 involved in the TLR (A) and NFkB (B) responses from the overall 754 gene panel used in  
1200 this study.

1201 **S11 Fig. Basic statistics of unique K-mers of *M. riyadhense* across 152 mycobacteria**  
1202 **genome assemblies.**

1203 **S1 Table. Comparison of *M. riyadhense* strains' assemblies.**

1204 **S2 Table. The SNPs analysis of different samples using MR226 as the reference.**

1205 **S3 Table. *M. marinum* LOS locus gene orthologs shared with *M. riyadhense* strains.**
